# Supplementary material for: DNA Repair Gene Expression Adjusted by the PCNA Metagene Predicts Survival in Multiple Cancers
Source: Preprints.org preprint supplement (doi:10.20944/preprints201902.0042.v1), 2019-02-04
Supplement: Supplementary file 2 [file supplementary]

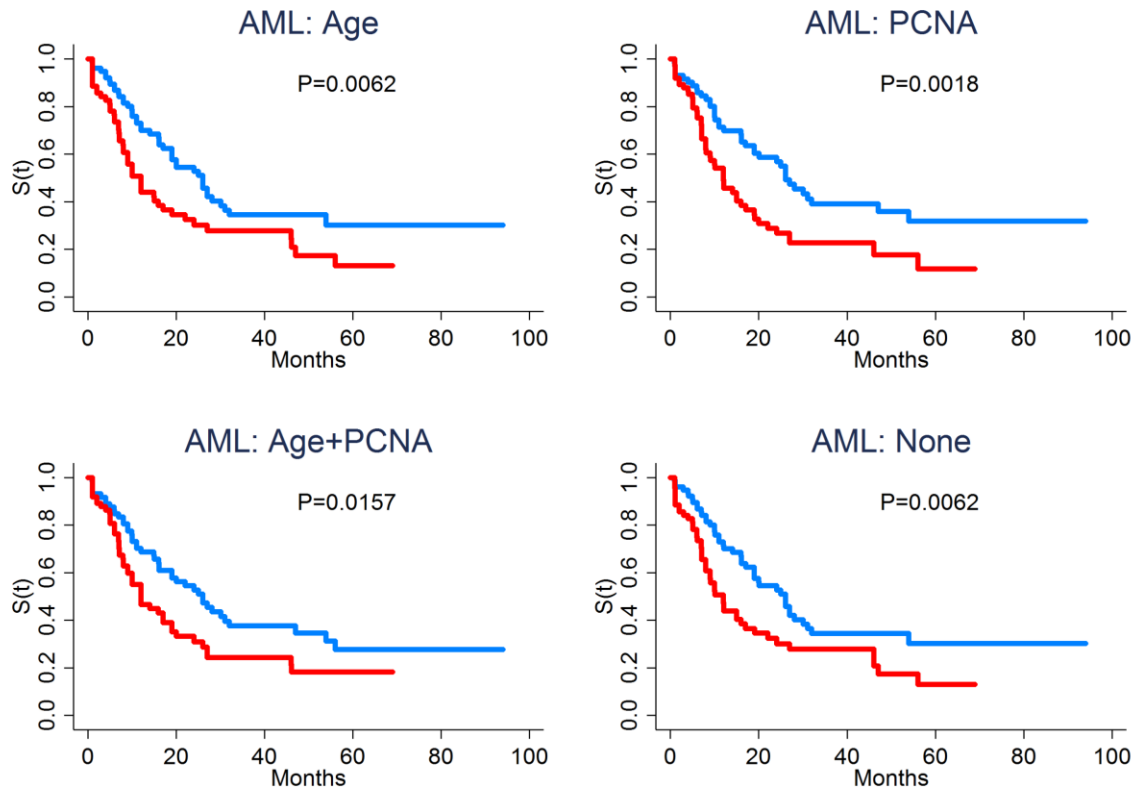

**Figure S1. Acute Myelogenous Leukemia: Kaplan-Meier logrank test results for single best binarized principal component (0,1) extracted from correlation matrix for  $p$  genes whose adjusted expression (via age, *PCNA* metagene) resulted in significant gene-specific KM logrank tests.**

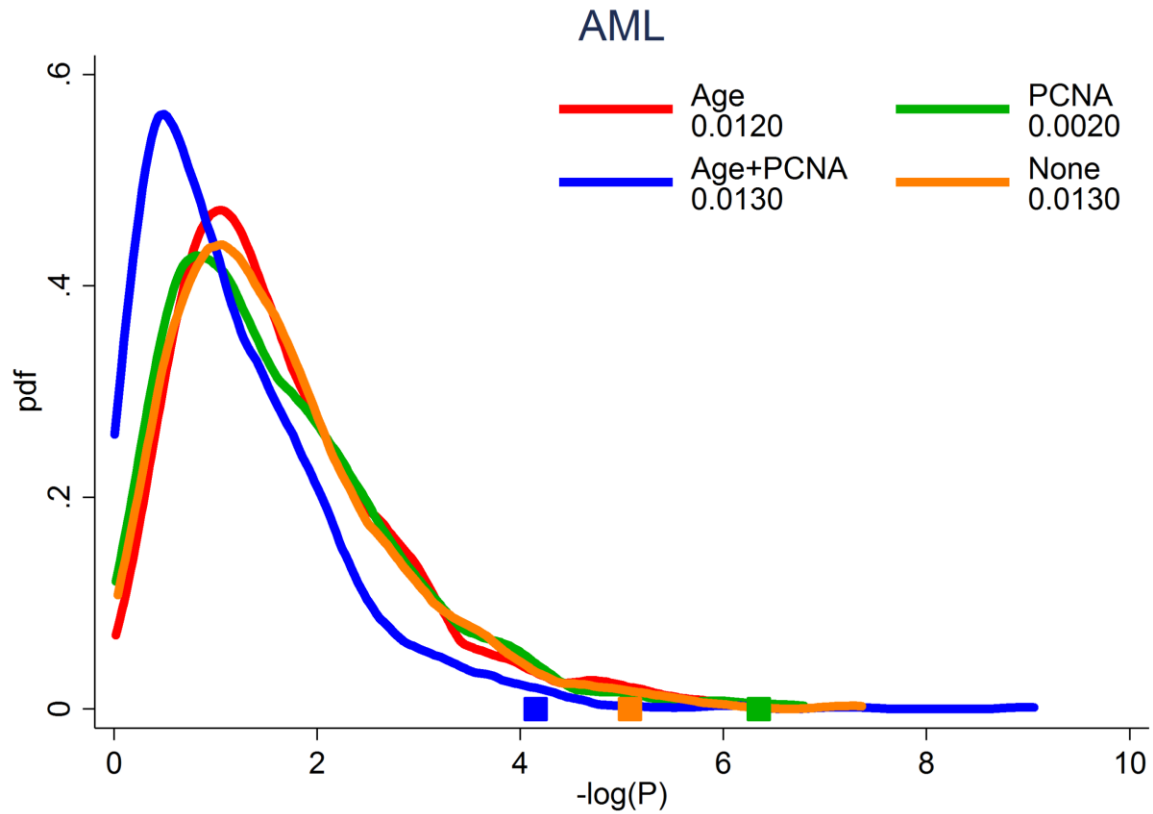

**Figure S2. Acute Myelogenous Leukemia: Empirical p-value test results for single best binarized principal component (0,1) extracted from correlation matrix for  $p$  genes whose adjusted expression (via age, *PCNA* metagene) resulted in significant gene-specific KM logrank tests. Square symbols denote the observed  $-\log(P)$  for the best binarized PC based on maximum likelihood analysis using KM analysis. Kernel density curves reflect the distribution of  $-\log(P)$  for KM analysis of the best binarized PC using  $p$  randomly selected genes  $B = 1000$  times.**

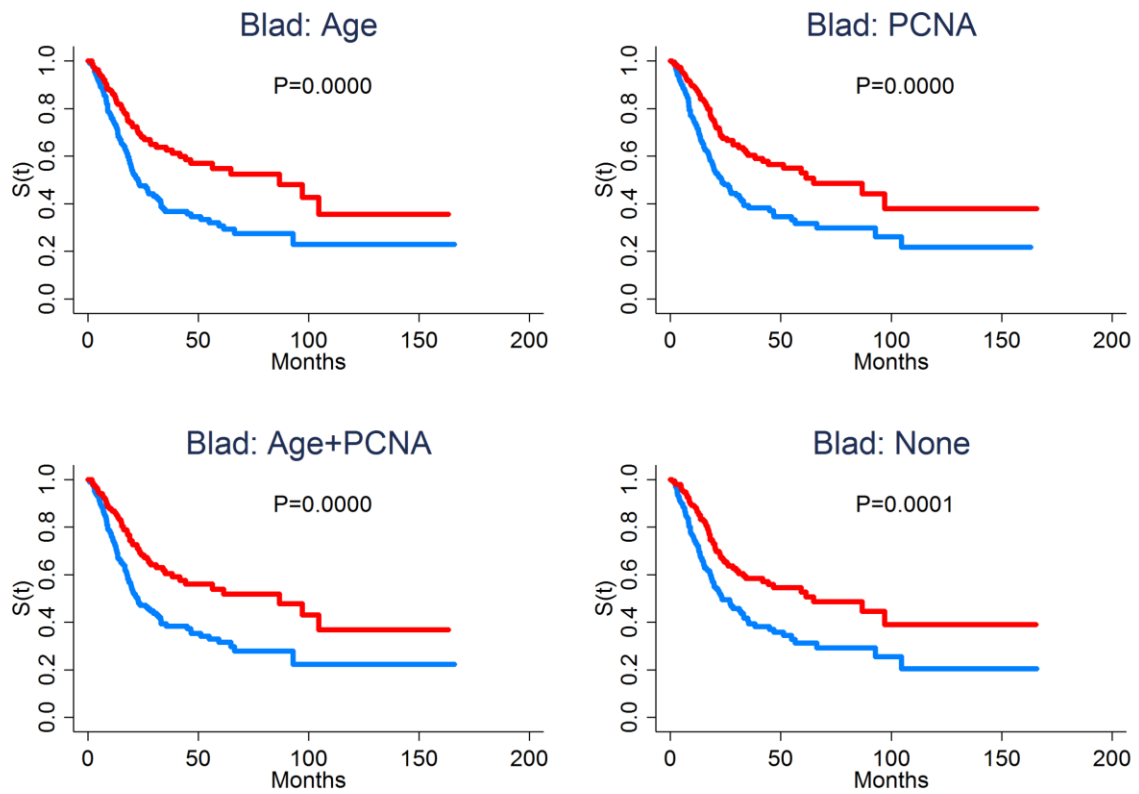

**Figure S3. Bladder: Kaplan-Meier logrank test results for single best binarized principal component (0,1) extracted from correlation matrix for  $p$  genes whose adjusted expression (via age, *PCNA* metagene) resulted in significant gene-specific KM logrank tests.**

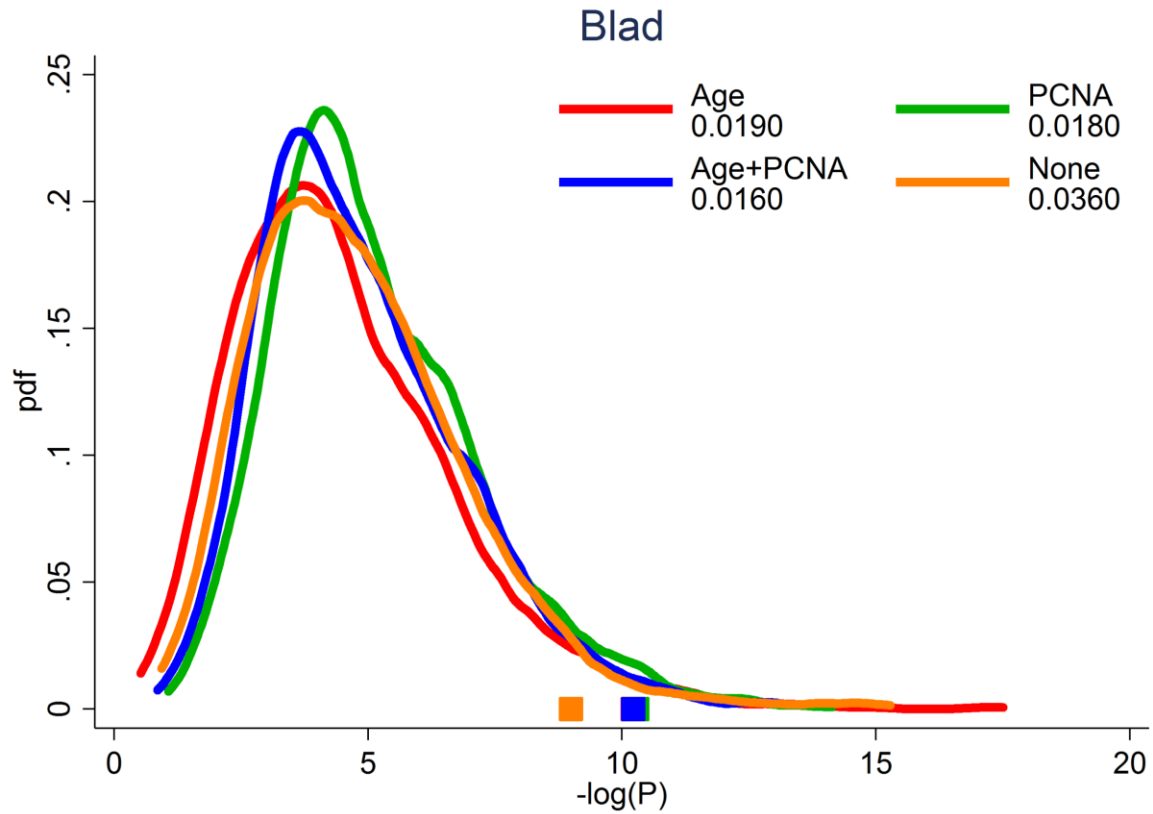

**Figure S4. Bladder: Empirical p-value test results for single best binarized principal component (0,1) extracted from correlation matrix for  $p$  genes whose adjusted expression (via age, *PCNA* metagene) resulted in significant gene-specific KM logrank tests. Square symbols denote the observed  $-\log(P)$  for the best binarized PC based on maximum likelihood analysis using KM analysis. Kernel density curves reflect the distribution of  $-\log(P)$  for KM analysis of the best binarized PC using  $p$  randomly selected genes  $B = 1000$  times.**

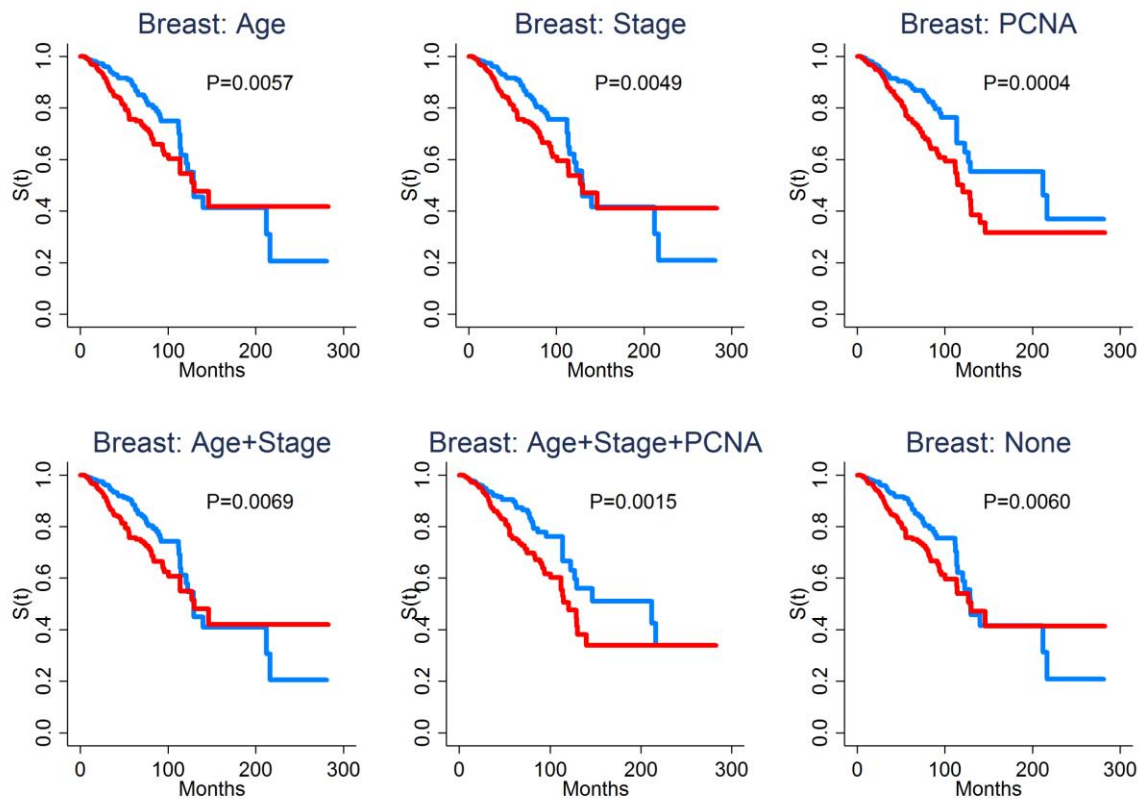

**Figure S5. Breast: Kaplan-Meier logrank test results for single best binarized principal component (0,1) extracted from correlation matrix for  $p$  genes whose adjusted expression (via age, stage, *PCNA* metagene) resulted in significant gene-specific KM logrank tests.**

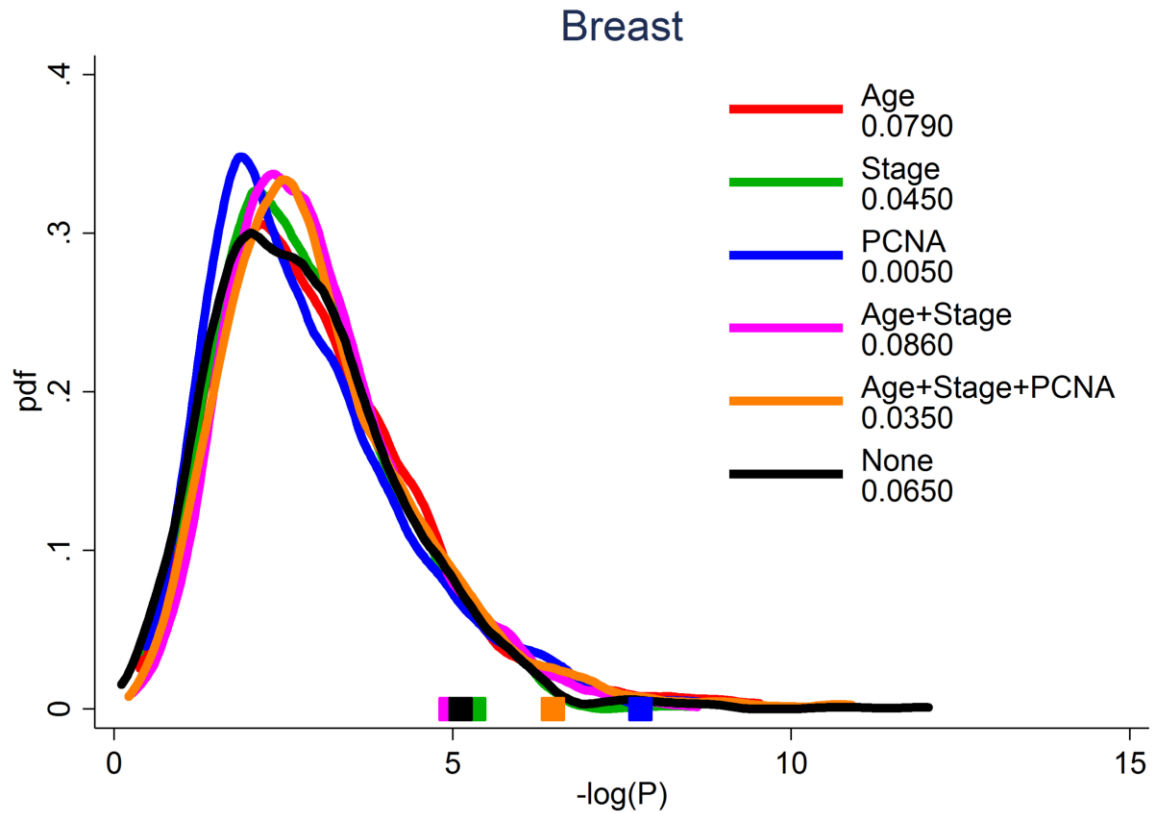

**Figure S6. Breast: Empirical p-value test results for single best binarized principal component (0,1) extracted from correlation matrix for  $p$  genes whose adjusted expression (via age, stage, *PCNA* metagene) resulted in significant gene-specific KM logrank tests. Square symbols denote the observed  $-\log(P)$  for the best binarized PC based on maximum likelihood analysis using KM analysis. Kernel density curves reflect the distribution of  $-\log(P)$  for KM analysis of the best binarized PC using  $p$  randomly selected genes  $B = 1000$  times.**

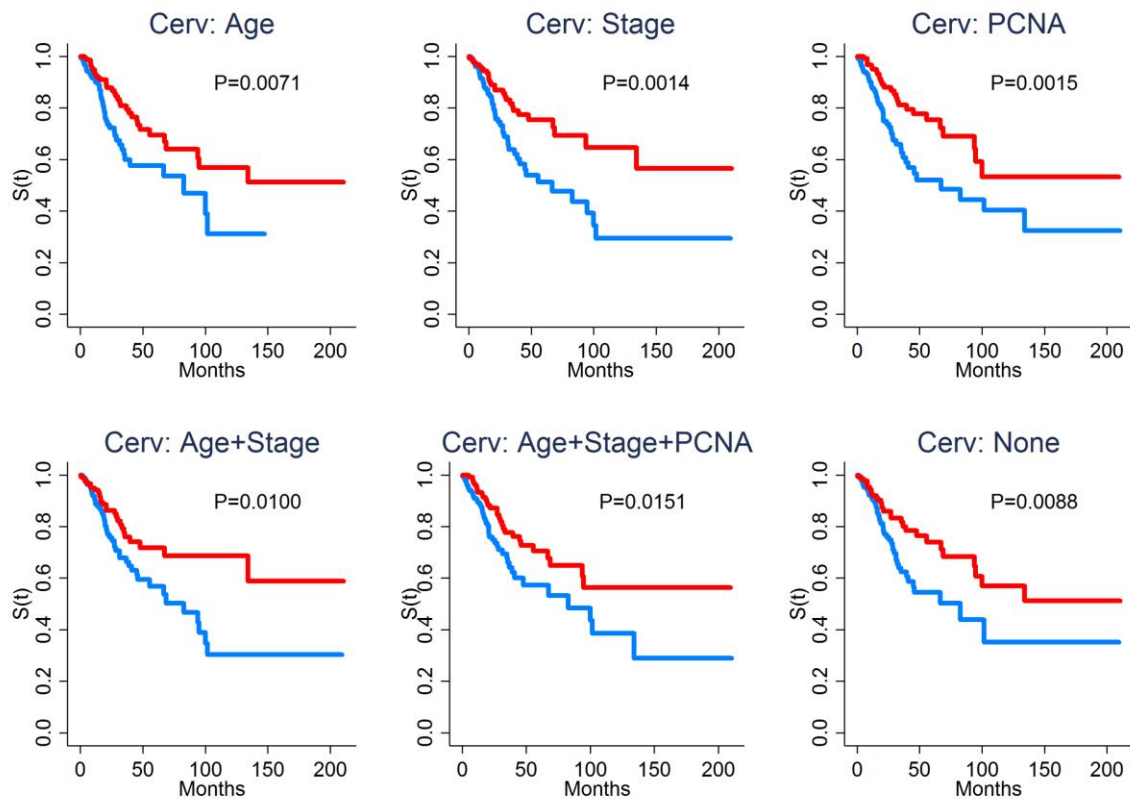

**Figure S7. Cervical: Kaplan-Meier logrank test results for single best binarized principal component (0,1) extracted from correlation matrix for  $p$  genes whose adjusted expression (via age, stage, *PCNA* metagene) resulted in significant gene-specific KM logrank tests.**

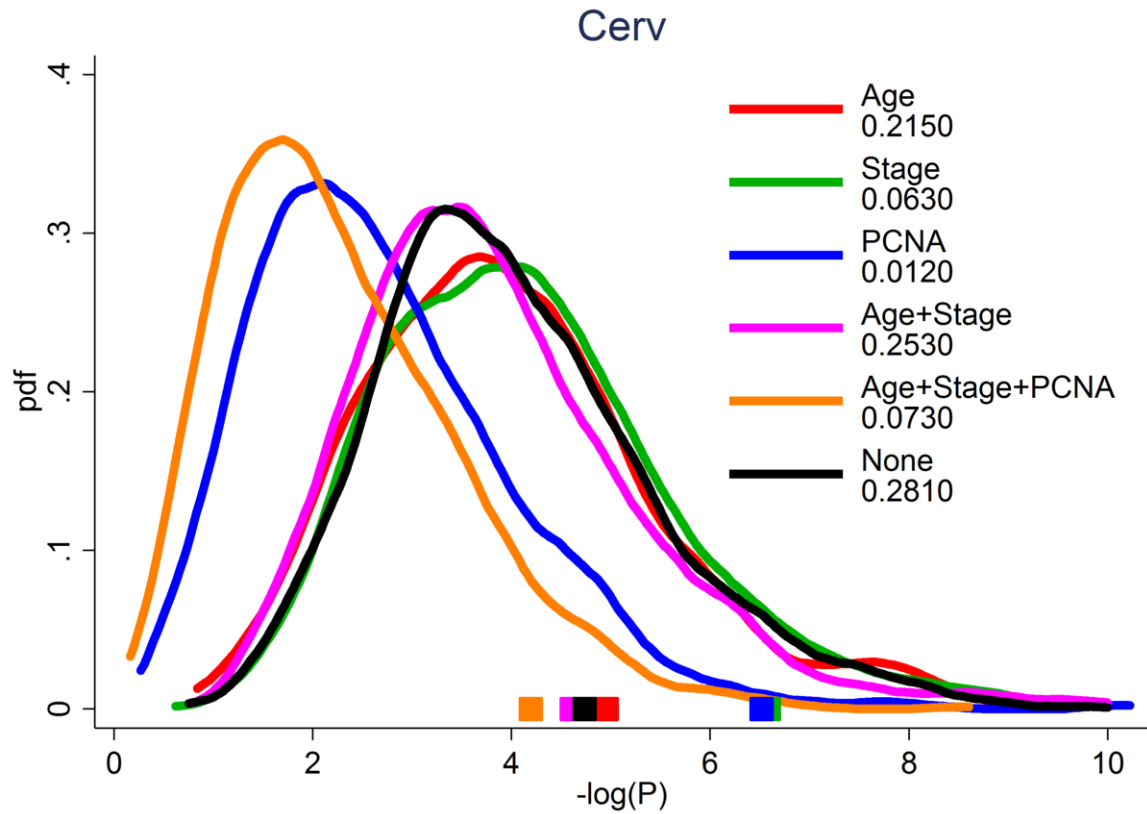

**Figure S8. Cervical: Empirical p-value test results for single best binarized principal component (0,1) extracted from correlation matrix for  $p$  genes whose adjusted expression (via age, stage, *PCNA* metagene) resulted in significant gene-specificKM logrank tests. Square symbols denote the observed  $-\log(P)$  for the best binarized PC based on maximum likelihood analysis using KM analysis. Kernel density curves reflect the distribution of  $-\log(P)$  for KM analysis of the best binarized PC using  $p$  randomly selected genes  $B = 1000$  times.**



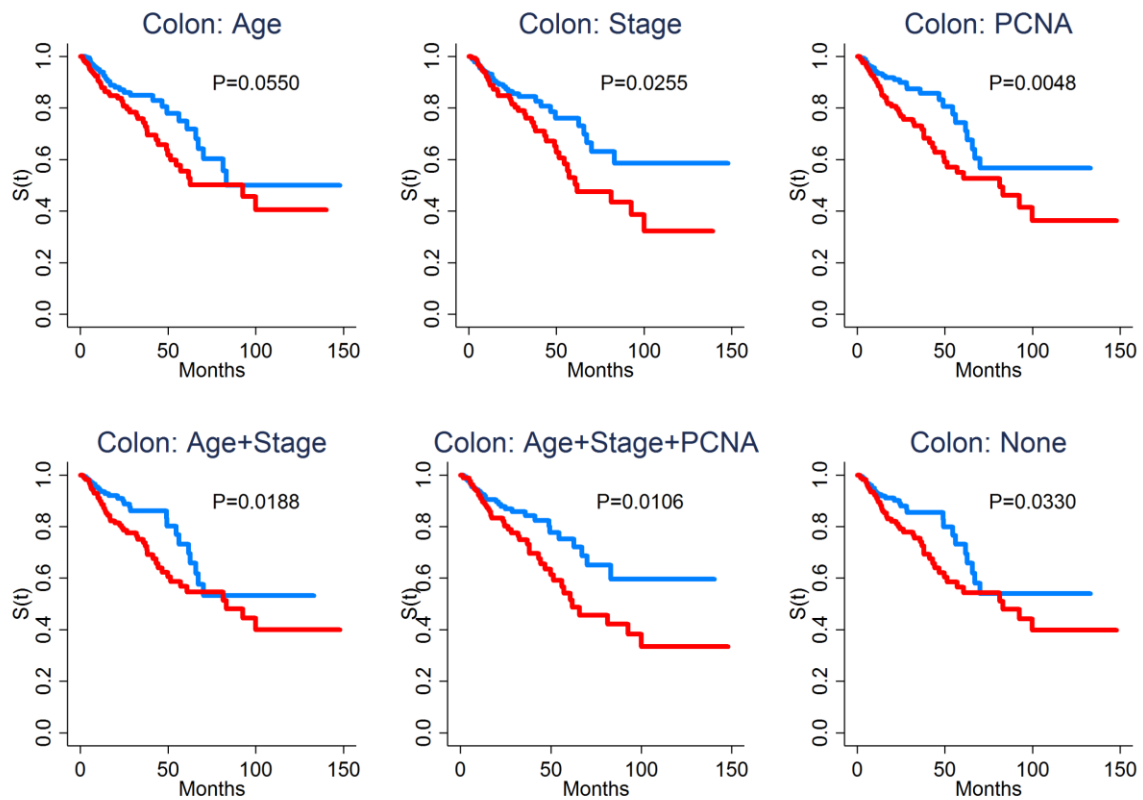

**Figure S9. Colorectal: Kaplan-Meier logrank test results for single best binarized principal component (0,1) extracted from correlation matrix for  $p$  genes whose adjusted expression (via age, stage, *PCNA* metagene) resulted in significant gene-specific KM logrank tests.**

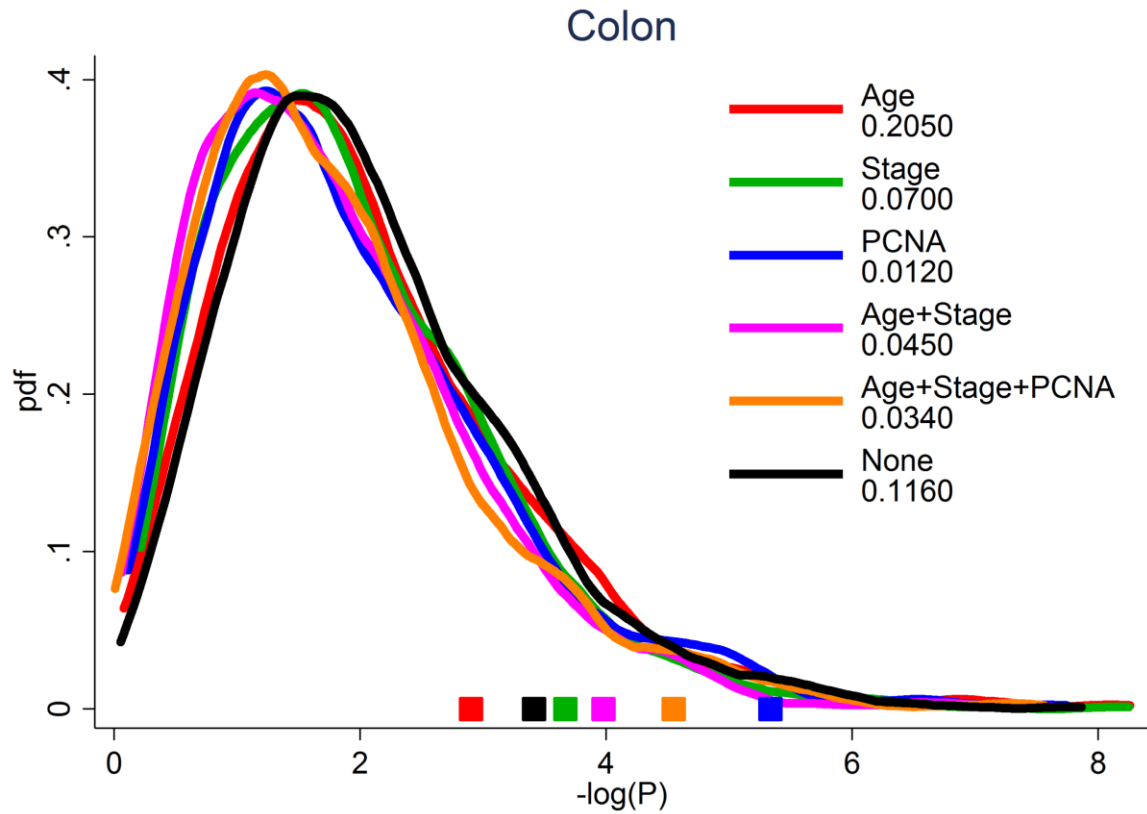

**Figure S10. Colorectal: Empirical p-value test results for single best binarized principal component (0,1) extracted from correlation matrix for  $p$  genes whose adjusted expression (via age, stage, *PCNA* metagene) resulted in significant gene-specific KM logrank tests. Square symbols denote the observed  $-\log(P)$  for the best binarized PC based on maximum likelihood analysis using KM analysis. Kernel density curves reflect the distribution of  $-\log(P)$  for KM analysis of the best binarized PC using  $p$  randomly selected genes  $B = 1000$  times.**

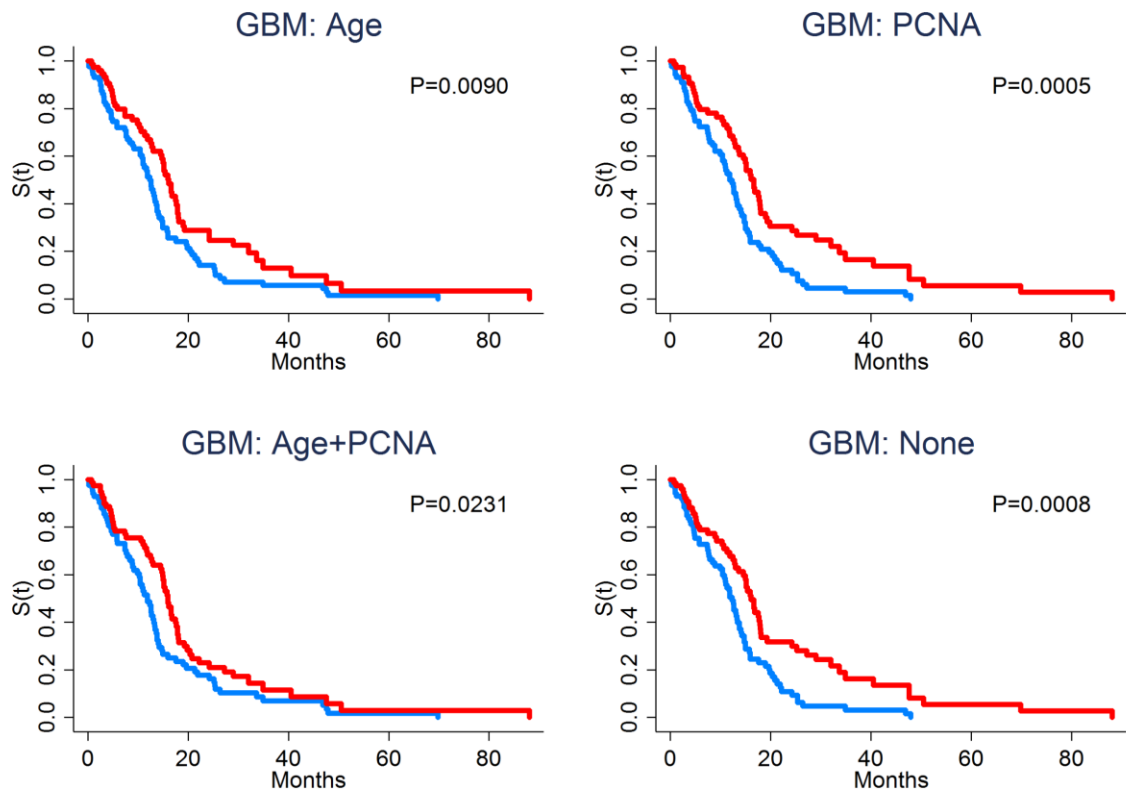

**Figure S11. Glioblastoma Multiforme: Kaplan-Meier logrank test results for single best binarized principal component (0,1) extracted from correlation matrix for  $p$  genes whose adjusted expression (via age, *PCNA* metagene) resulted in significant gene-specific KM logrank tests.**

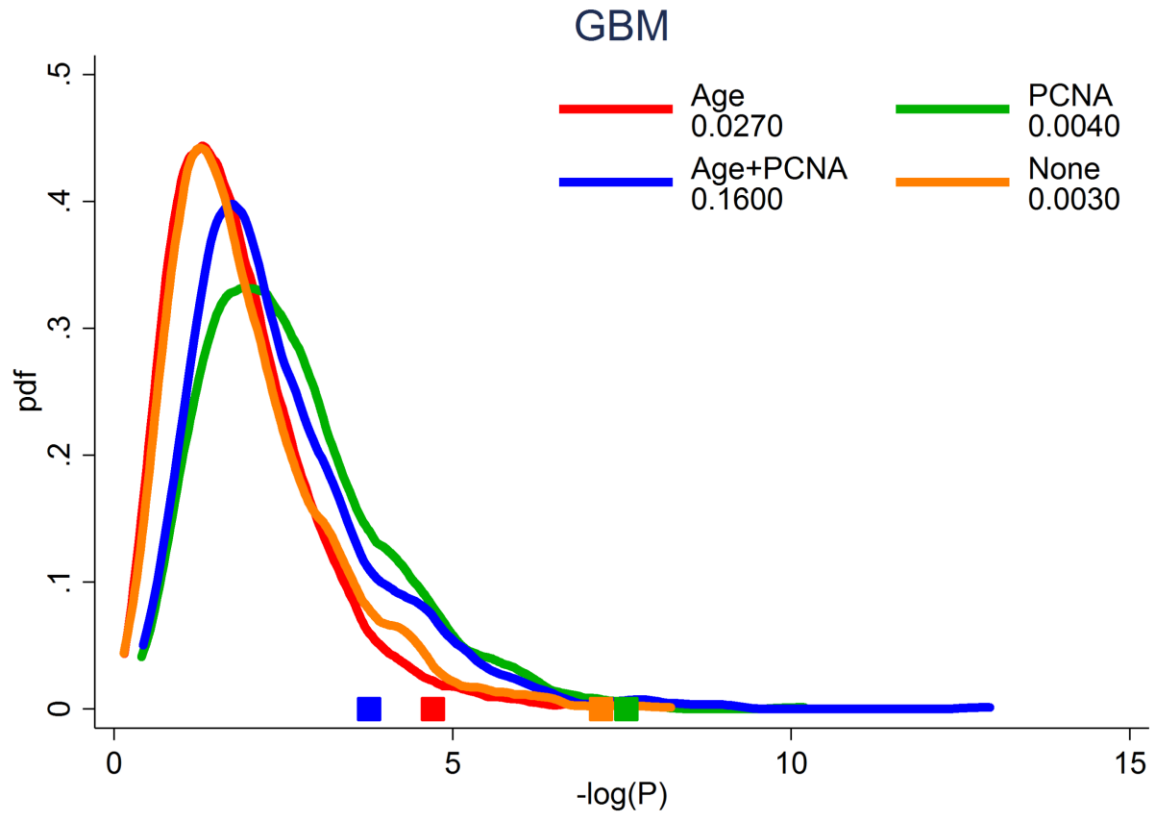

**Figure S12. Glioblastoma Multiforme: Empirical p-value test results for single best binarized principal component (0,1) extracted from correlation matrix for  $p$  genes whose adjusted expression (via age, *PCNA* metagene) resulted in significant gene-specific KM logrank tests. Square symbols denote the observed  $-\log(P)$  for the best binarized PC based on maximum likelihood analysis using KM analysis. Kernel density curves reflect the distribution of  $-\log(P)$  for KM analysis of the best binarized PC using  $p$  randomly selected genes  $B = 1000$  times.**

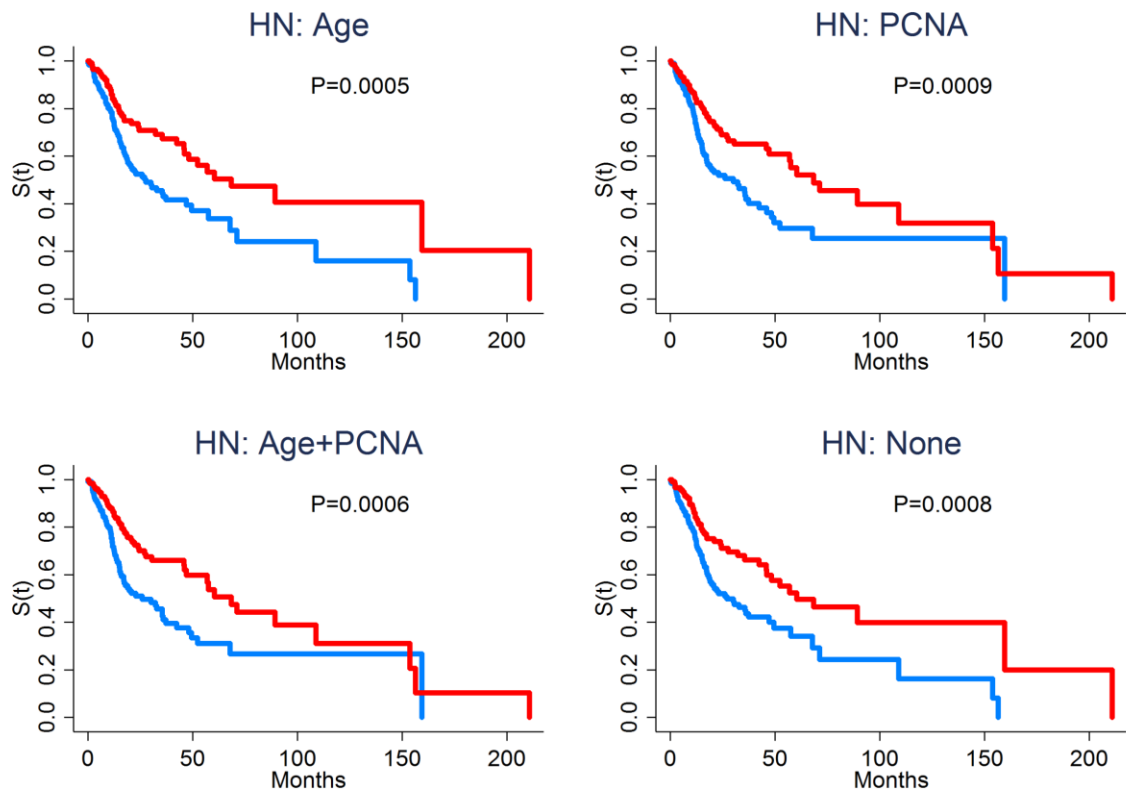

**Figure S13. Head and Neck: Kaplan-Meier logrank test results for single best binarized principal component (0,1) extracted from correlation matrix for  $p$  genes whose adjusted expression (via age, *PCNA* metagene) resulted in significant gene-specificKM logrank tests.**

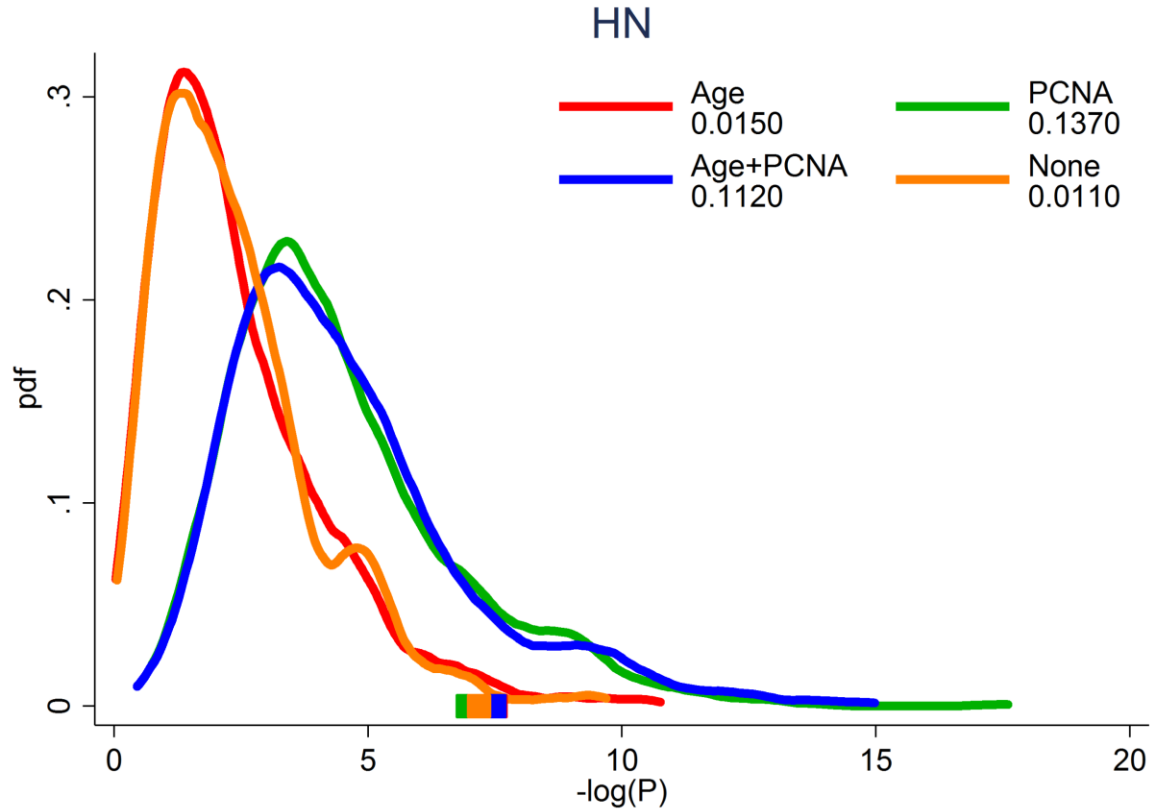

**Figure S14. Head and Neck: Empirical p-value test results for single best binarized principal component (0,1) extracted from correlation matrix for  $p$  genes whose adjusted expression (via age, *PCNA* metagene) resulted in significant gene-specific KM logrank tests. Square symbols denote the observed  $-\log(P)$  for the best binarized PC based on maximum likelihood analysis using KM analysis. Kernel density curves reflect the distribution of  $-\log(P)$  for KM analysis of the best binarized PC using  $p$  randomly selected genes  $B = 1000$  times.**

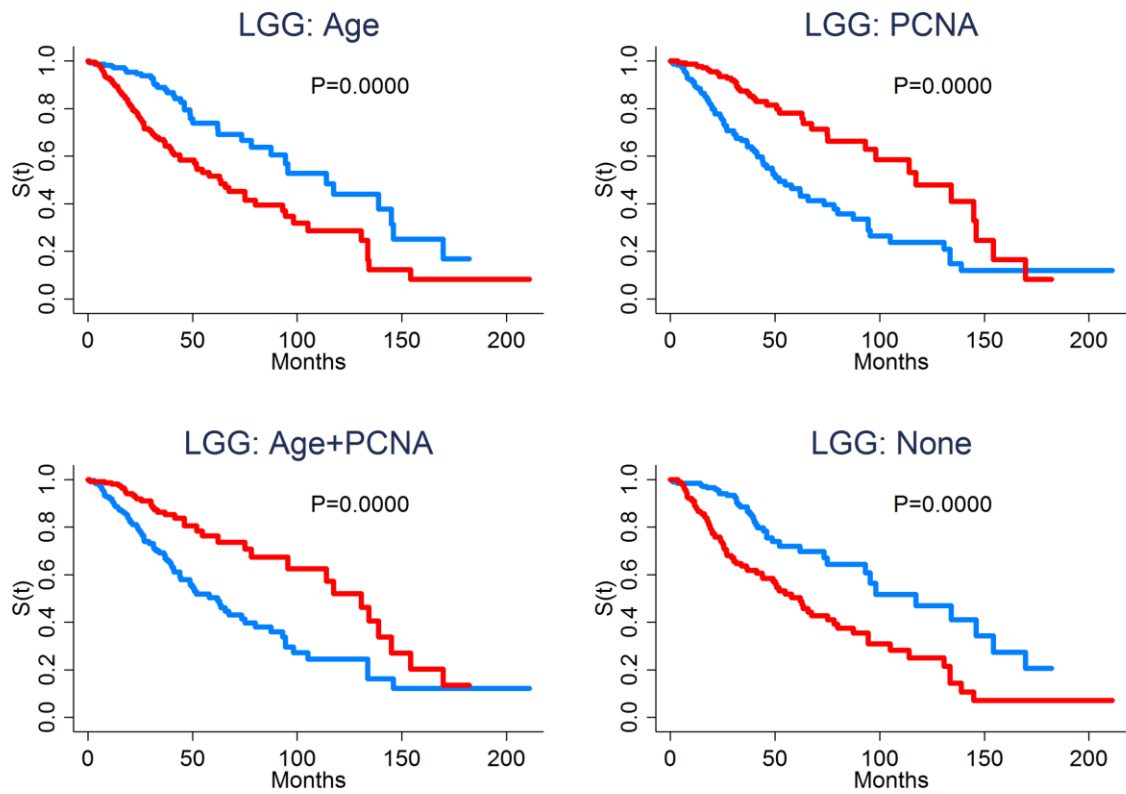

**Figure S15. Low Grade Gliomas: Kaplan-Meier logrank test results for single best binarized principal component (0,1) extracted from correlation matrix for  $p$  genes whose adjusted expression (via age, *PCNA* metagene) resulted in significant gene-specific KM logrank tests.**

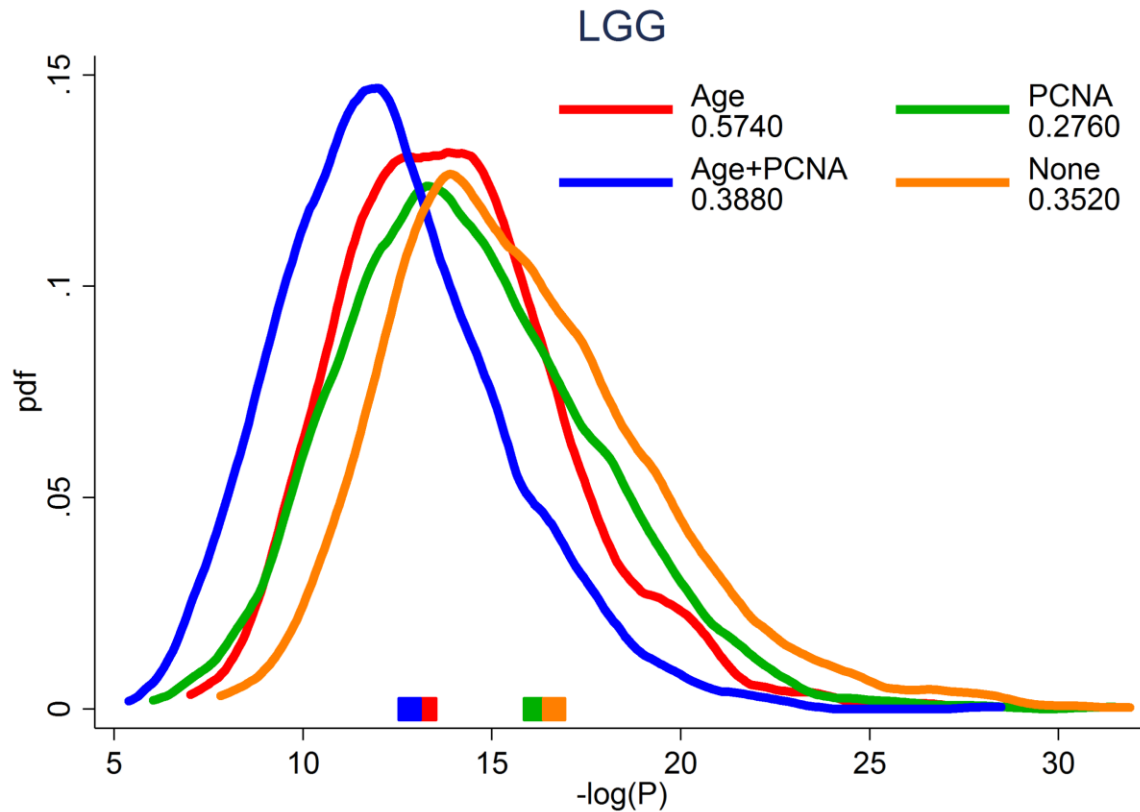

**Figure S16. Low Grade Gliomas: Empirical p-value test results for single best binarized principal component (0,1) extracted from correlation matrix for  $p$  genes whose adjusted expression (via age, *PCNA* metagene) resulted in significant gene-specific KM logrank tests. Square symbols denote the observed  $-\log(P)$  for the best binarized PC based on maximum likelihood analysis using KM analysis. Kernel density curves reflect the distribution of  $-\log(P)$  for KM analysis of the best binarized PC using  $p$  randomly selected genes  $B = 1000$  times.**



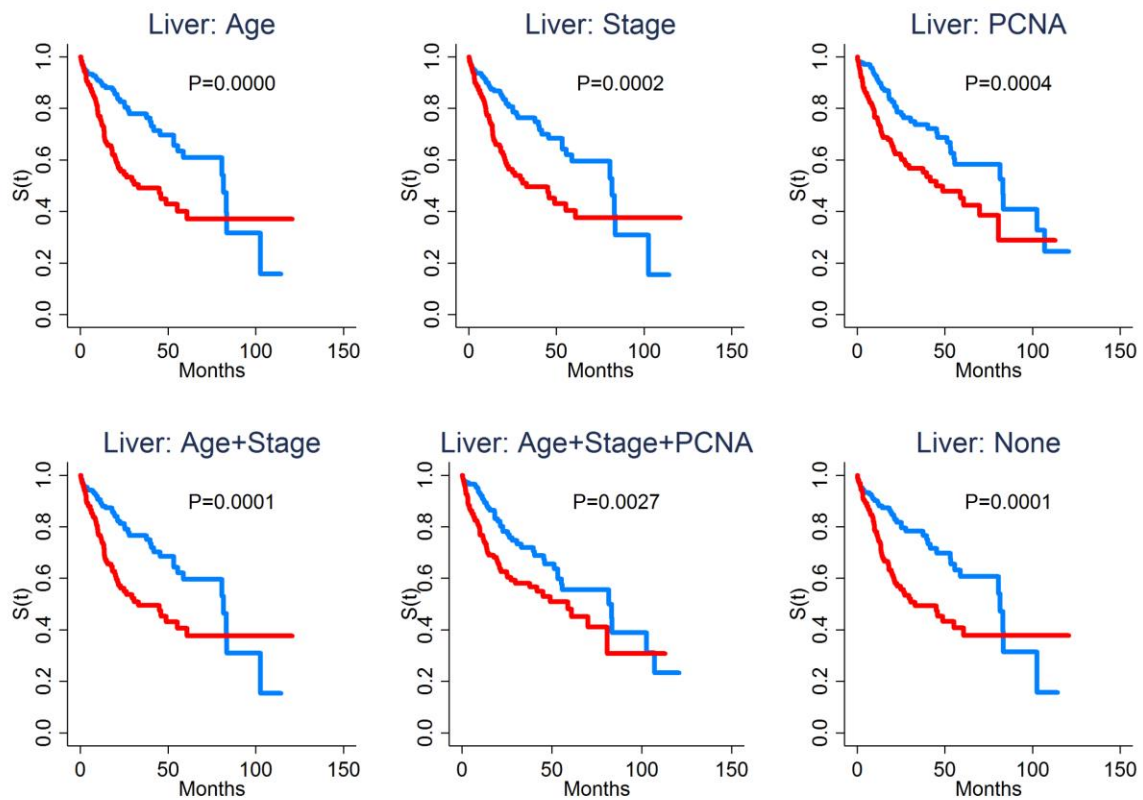

**Figure S17. Liver: Kaplan-Meier logrank test results for single best binarized principal component (0,1) extracted from correlation matrix for  $p$  genes whose adjusted expression (via age, stage, *PCNA* metagene) resulted in significant gene-specific KM logrank tests.**

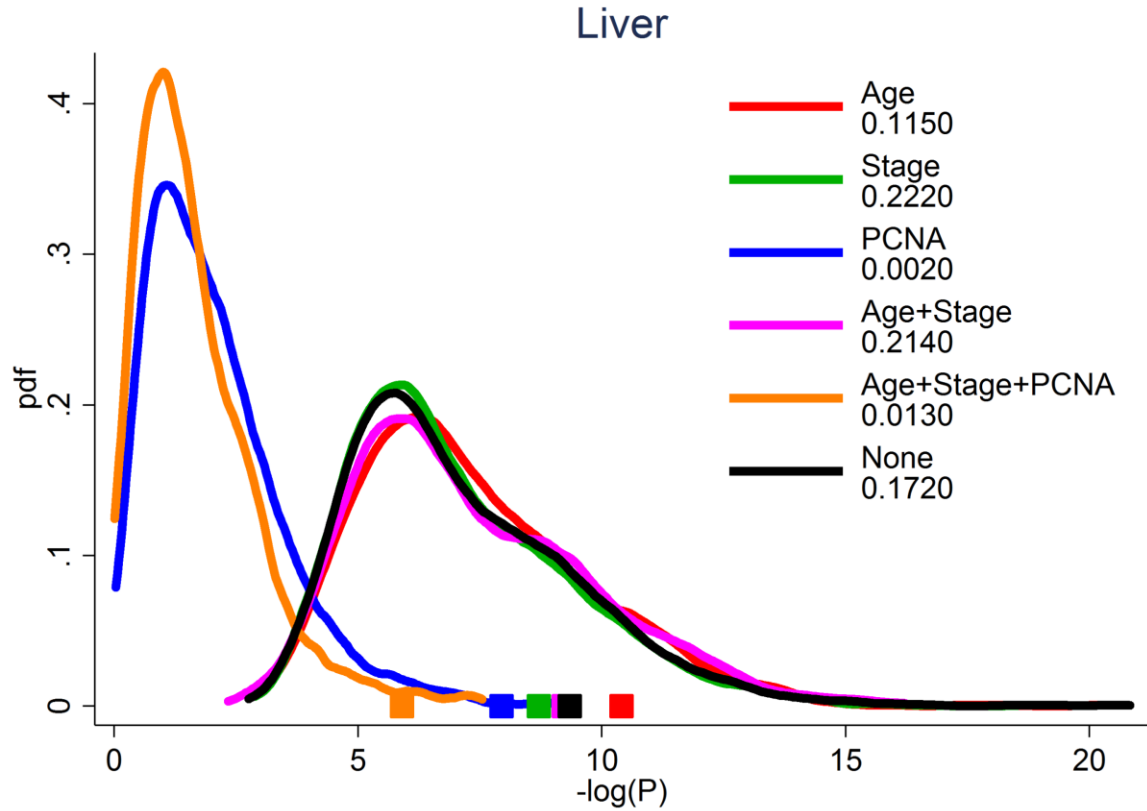

**Figure S18. Liver: Empirical p-value test results for single best binarized principal component (0,1) extracted from correlation matrix for  $p$  genes whose adjusted expression (via age, stage, *PCNA* metagene) resulted in significant gene-specific KM logrank tests. Square symbols denote the observed  $-\log(P)$  for the best binarized PC based on maximum likelihood analysis using KM analysis. Kernel density curves reflect the distribution of  $-\log(P)$  for KM analysis of the best binarized PC using  $p$  randomly selected genes  $B = 1000$  times.**

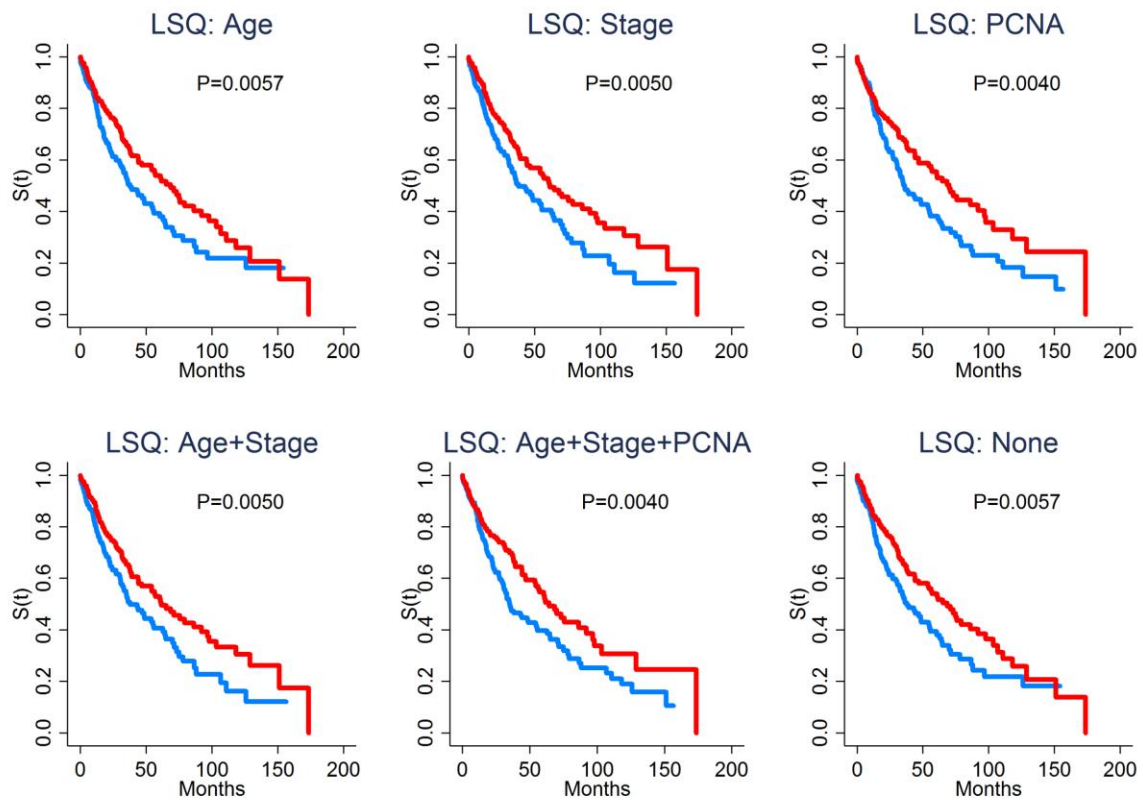

**Figure S19. Lung Sq. Cell: Kaplan-Meier logrank test results for single best binarized principal component (0,1) extracted from correlation matrix for  $p$  genes whose adjusted expression (via age, stage, *PCNA* metagene) resulted in significant gene-specific KM logrank tests.**

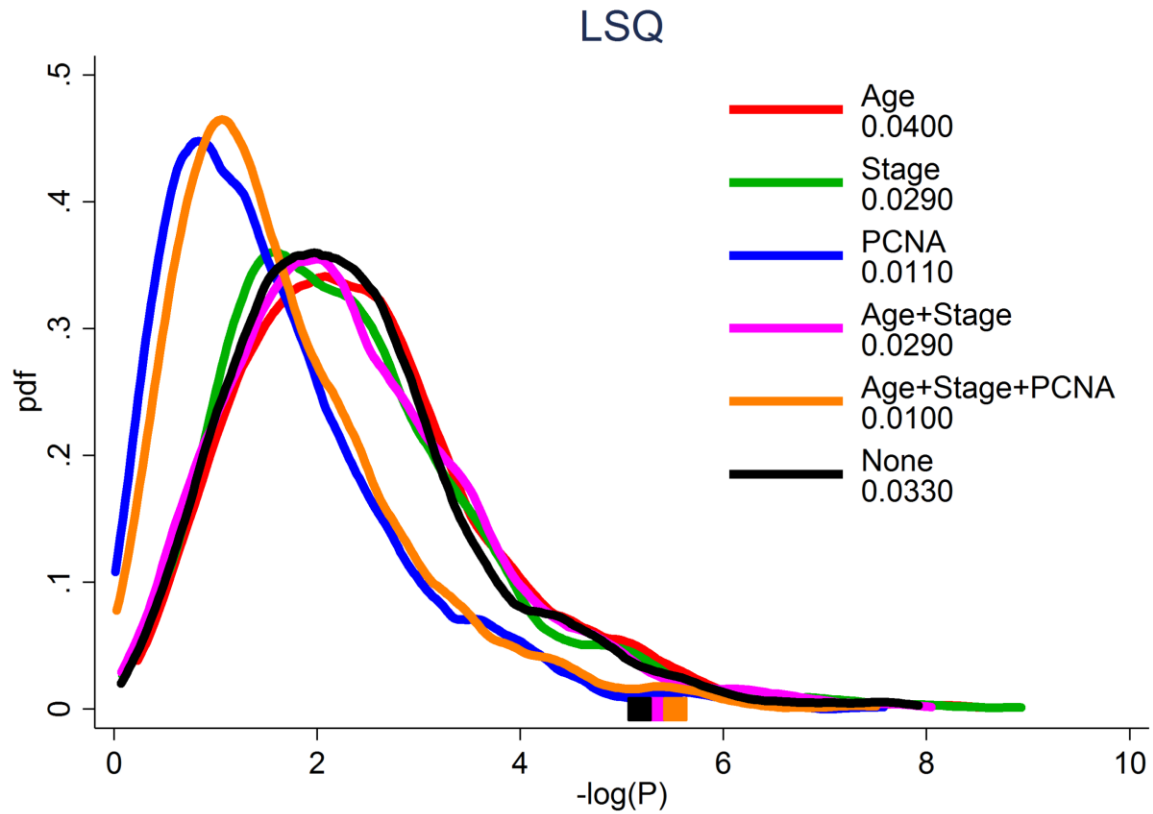

**Figure S20. Lung Sq. Cell: Empirical p-value test results for single best binarized principal component (0,1) extracted from correlation matrix for  $p$  genes whose adjusted expression (via age, stage, *PCNA* metagene) resulted in significant gene-specific KM logrank tests. Square symbols denote the observed  $-\log(P)$  for the best binarized PC based on maximum likelihood analysis using KM analysis. Kernel density curves reflect the distribution of  $-\log(P)$  for KM analysis of the best binarized PC using  $p$  randomly selected genes  $B = 1000$  times.**

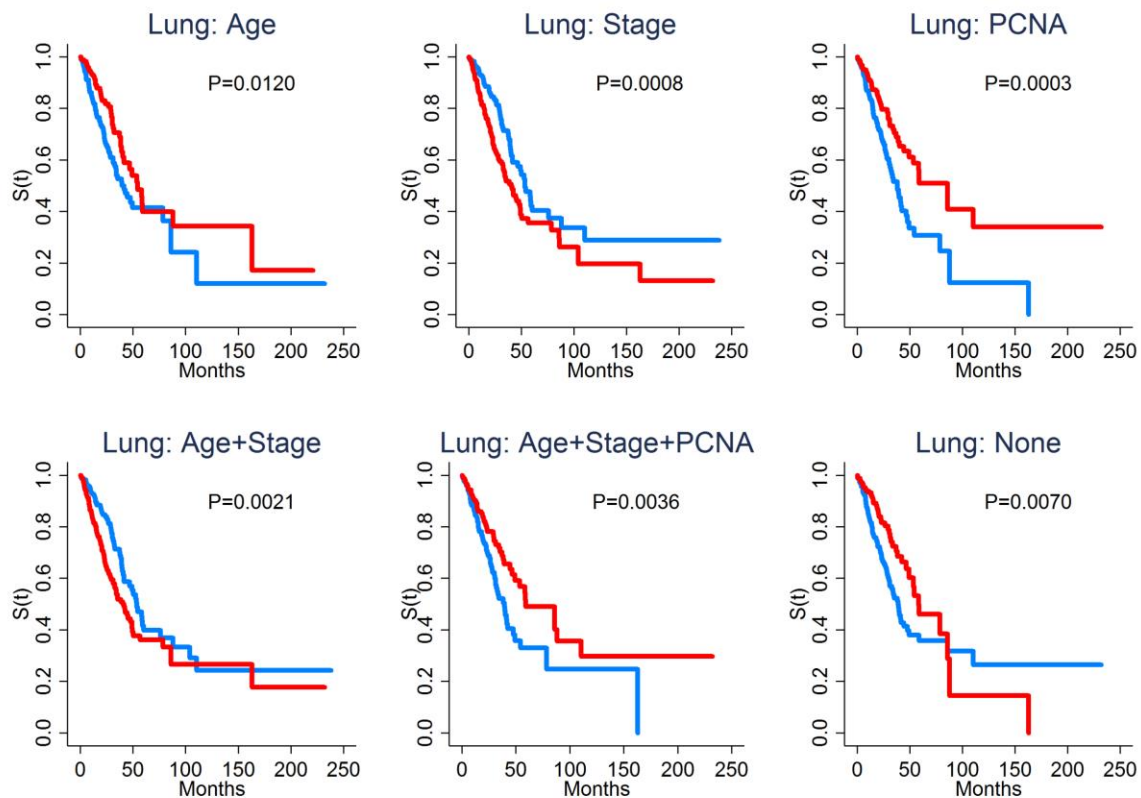

**Figure S21. Lung: Kaplan-Meier logrank test results for single best binarized principal component (0,1) extracted from correlation matrix for  $p$  genes whose adjusted expression (via age, stage, *PCNA* metagene) resulted in significant gene-specific KM logrank tests.**

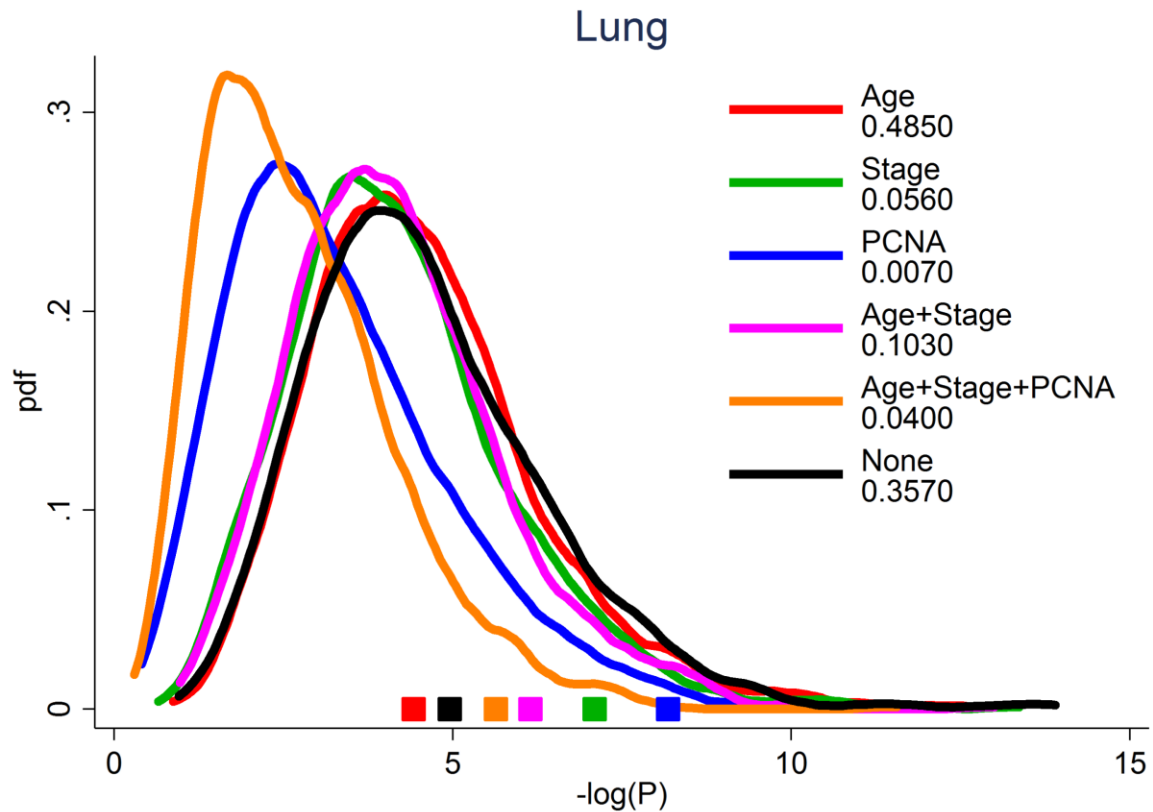

**Figure S22. Lung: Empirical p-value test results for single best binarized principal component (0,1) extracted from correlation matrix for  $p$  genes whose adjusted expression (via age, stage, *PCNA* metagene) resulted in significant gene-specific KM logrank tests. Square symbols denote the observed  $-\log(P)$  for the best binarized PC based on maximum likelihood analysis using KM analysis. Kernel density curves reflect the distribution of  $-\log(P)$  for KM analysis of the best binarized PC using  $p$  randomly selected genes  $B = 1000$  times.**

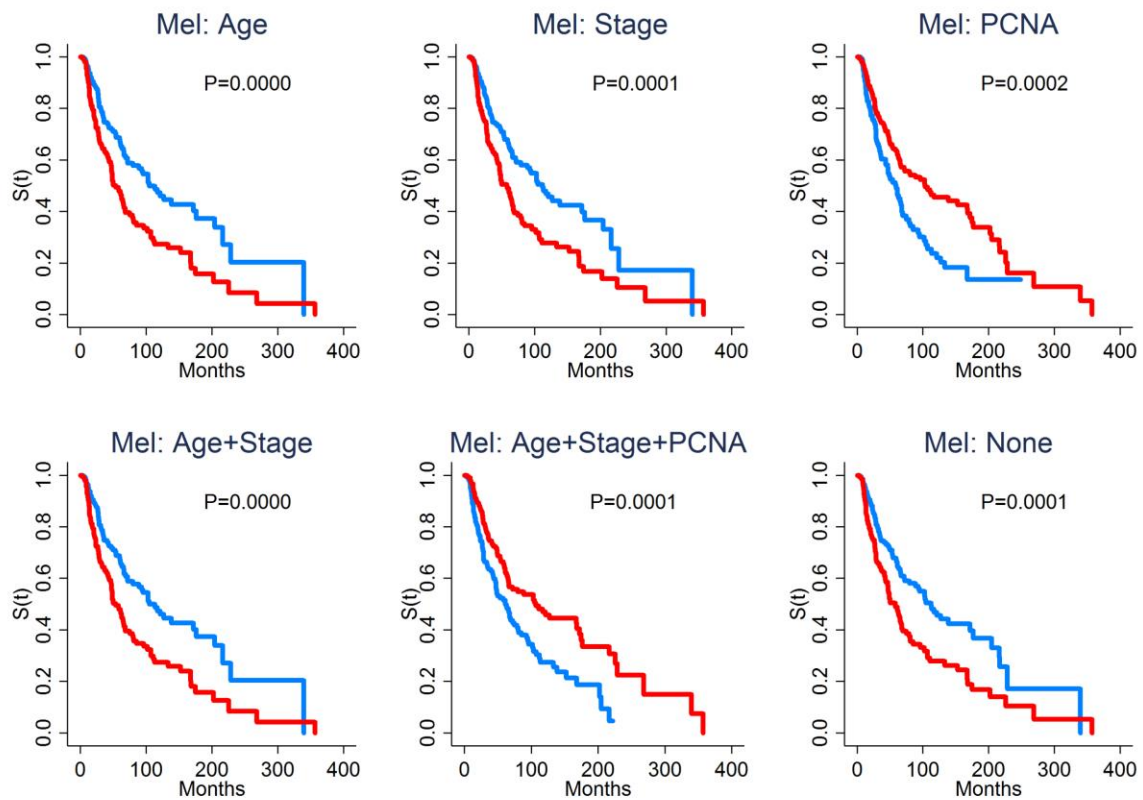

**Figure S23. Melanoma: Kaplan-Meier logrank test results for single best binarized principal component (0,1) extracted from correlation matrix for  $p$  genes whose adjusted expression (via age, stage, *PCNA* metagene) resulted in significant gene-specific KM logrank tests.**

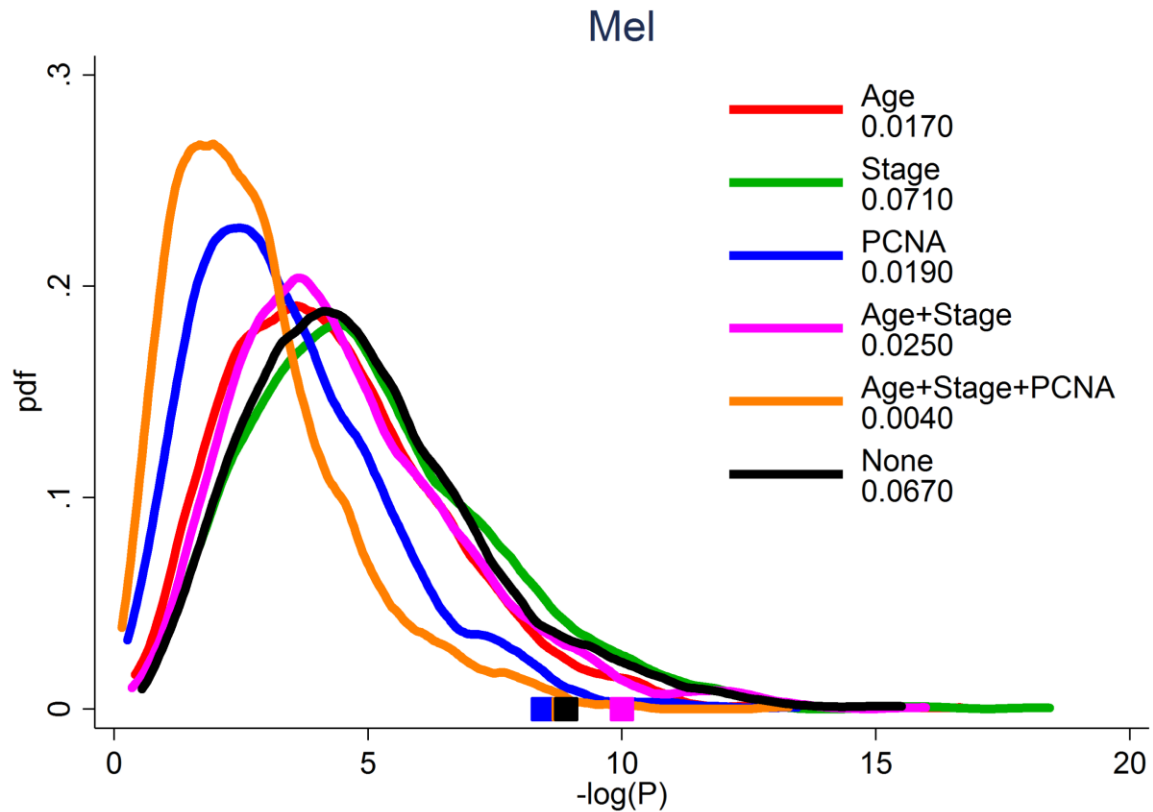

**Figure S24. Melanoma: Empirical p-value test results for single best binarized principal component (0,1) extracted from correlation matrix for  $p$  genes whose adjusted expression (via age, stage, *PCNA* metagene) resulted in significant gene-specific KM logrank tests. Square symbols denote the observed  $-\log(P)$  for the best binarized PC based on maximum likelihood analysis using KM analysis. Kernel density curves reflect the distribution of  $-\log(P)$  for KM analysis of the best binarized PC using  $p$  randomly selected genes  $B = 1000$  times.**



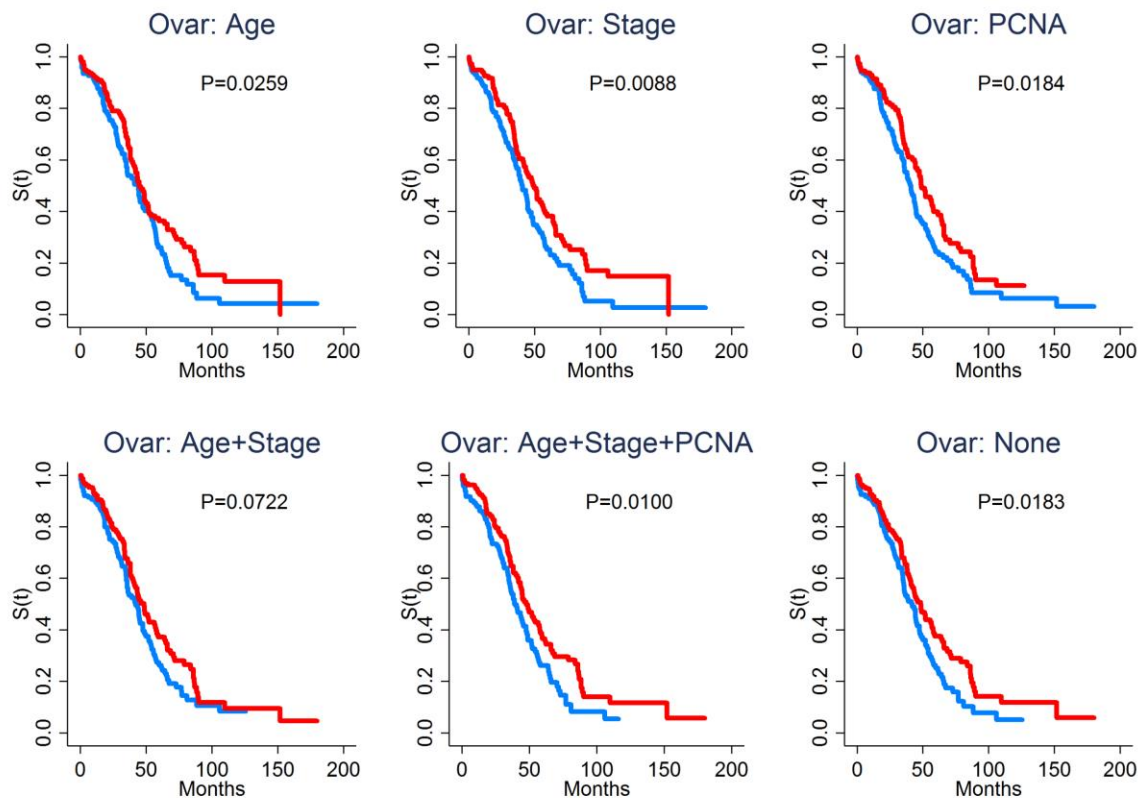

**Figure S25. Ovarian: Kaplan-Meier logrank test results for single best binarized principal component (0,1) extracted from correlation matrix for  $p$  genes whose adjusted expression (via age, stage, *PCNA* metagene) resulted in significant gene-specific KM logrank tests.**

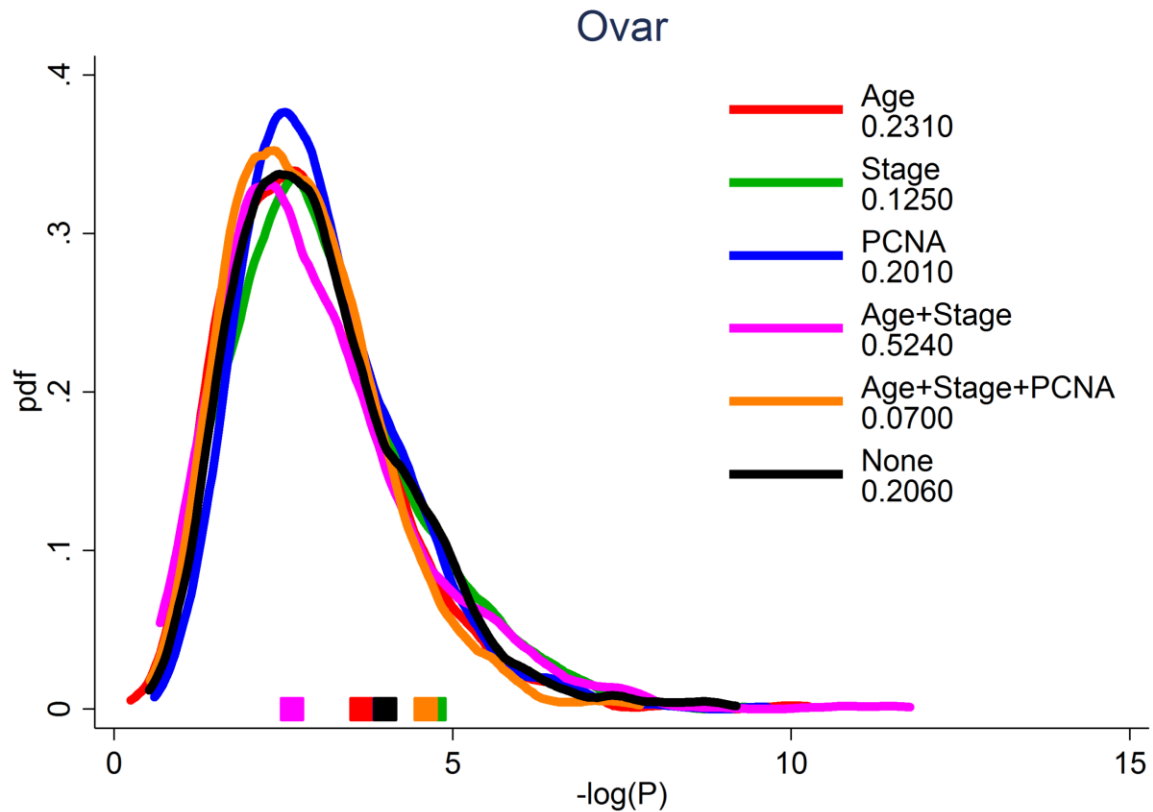

**Figure S26. Ovarian: Empirical p-value test results for single best binarized principal component (0,1) extracted from correlation matrix for  $p$  genes whose adjusted expression (via age, stage, *PCNA* metagene) resulted in significant gene-specific KMlogrank tests. Square symbols denote the observed  $-\log(P)$  for the best binarized PC based on maximum likelihood analysis using KM analysis. Kernel density curves reflect the distribution of  $-\log(P)$  for KM analysis of the best binarized PC using  $p$  randomly selected genes  $B = 1000$  times.**

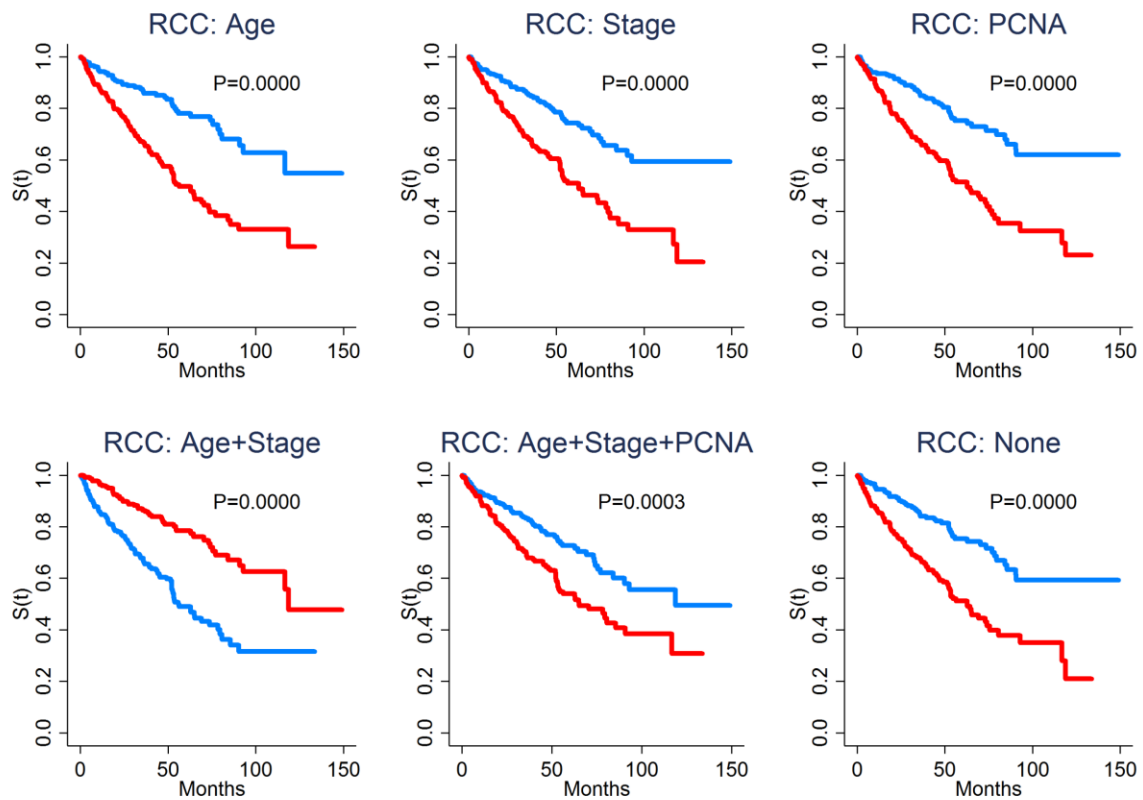

**Figure S27. Renal Clear Cell: Kaplan-Meier logrank test results for single best binarized principal component (0,1) extracted from correlation matrix for  $p$  genes whose adjusted expression (via age, stage, *PCNA* metagene) resulted in significant gene-specific KM logrank tests.**

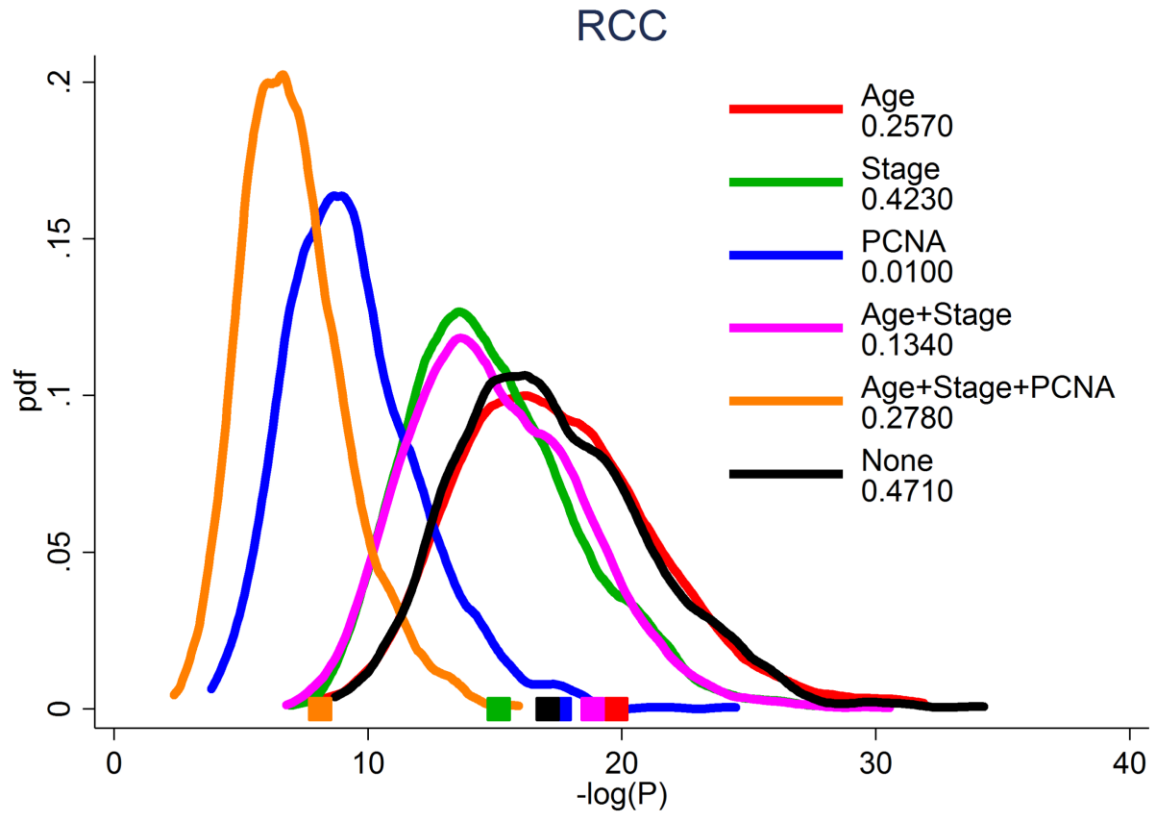

**Figure S28. Renal Clear Cell: Empirical p-value test results for single best binarized principal component (0,1) extracted from correlation matrix for  $p$  genes whose adjusted expression (via age, stage, *PCNA* metagene) resulted in significant gene-specific KM logrank tests. Square symbols denote the observed  $-\log(P)$  for the best binarized PC based on maximum likelihood analysis using KM analysis. Kernel density curves reflect the distribution of  $-\log(P)$  for KM analysis of the best binarized PC using  $p$  randomly selected genes  $B = 1000$  times.**

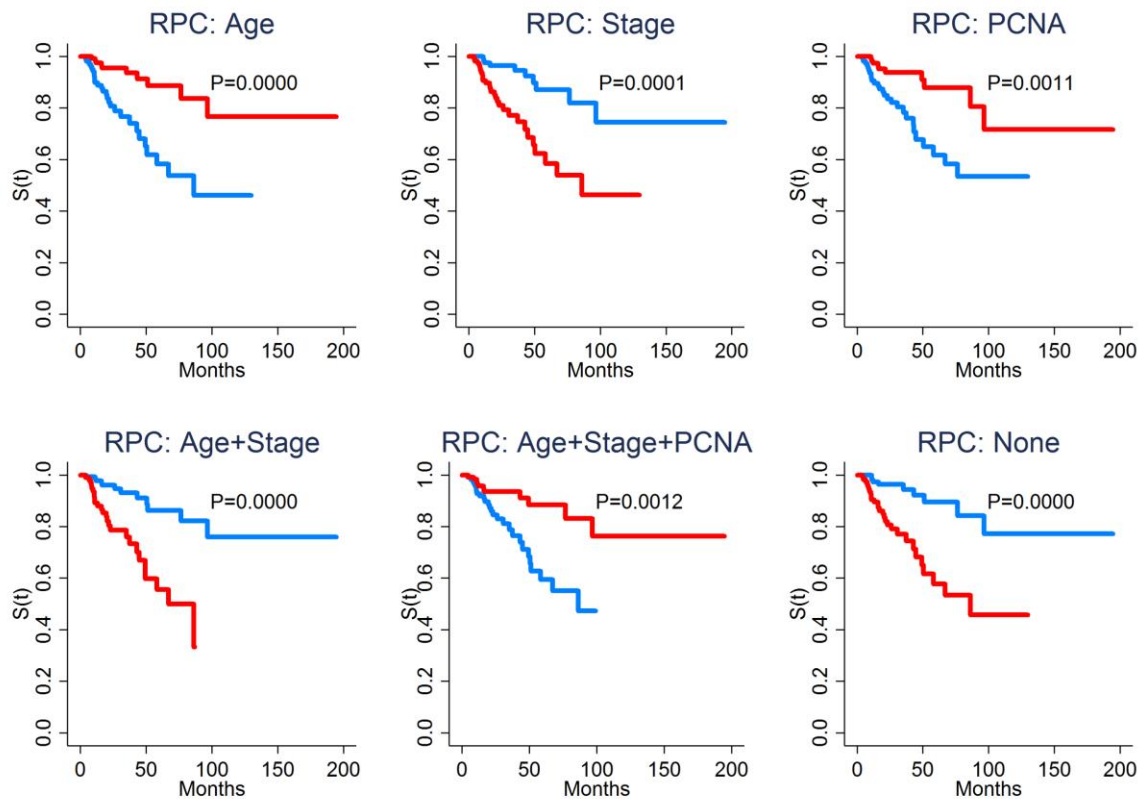

**Figure S29. Renal Papillary: Kaplan-Meier logrank test results for single best binarized principal component (0,1) extracted from correlation matrix for  $p$  genes whose adjusted expression (via age, stage, *PCNA* metagene) resulted in significant gene-specific KM logrank tests.**

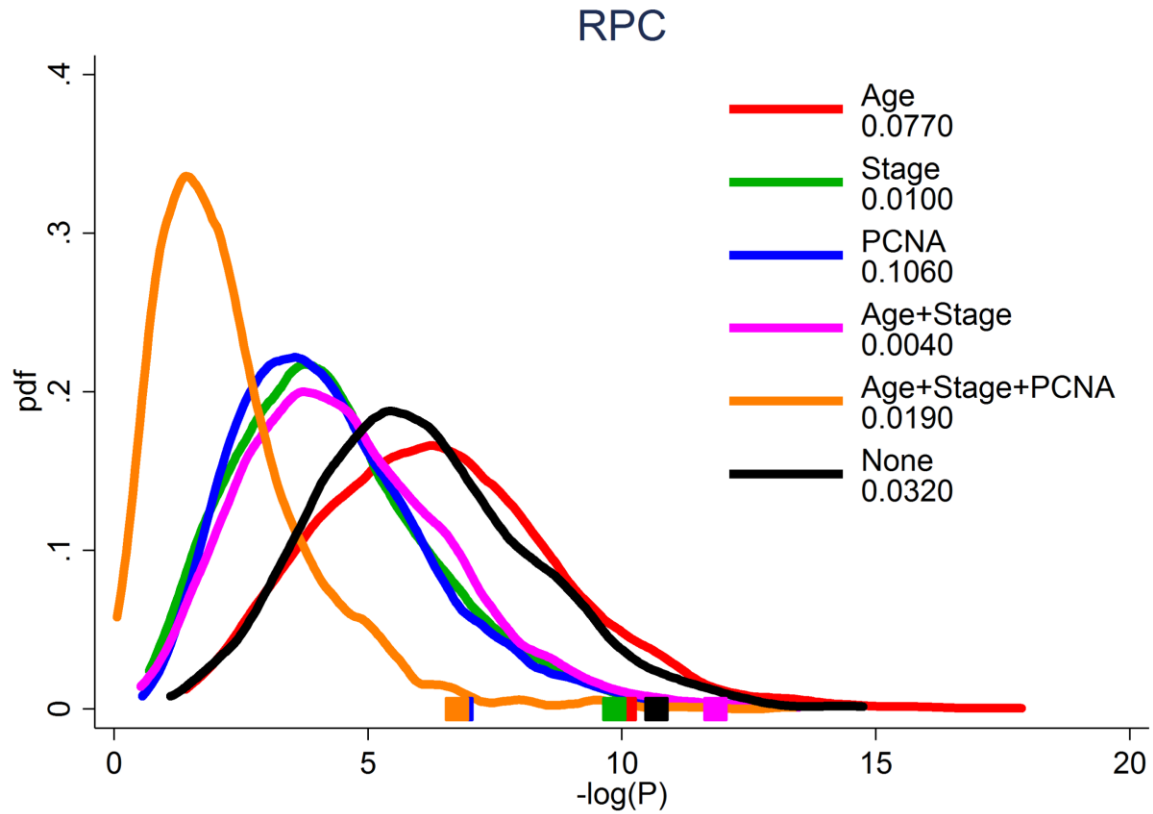

**Figure S30. Renal Papillary: Empirical p-value test results for single best binarized principal component (0,1) extracted from correlation matrix for  $p$  genes whose adjusted expression (via age, stage, *PCNA* metagene) resulted in significant gene-specific KM logrank tests. Square symbols denote the observed  $-\log(P)$  for the best binarized PC based on maximum likelihood analysis using KM analysis. Kernel density curves reflect the distribution of  $-\log(P)$  for KM analysis of the best binarized PC using  $p$  randomly selected genes  $B = 1000$  times.**

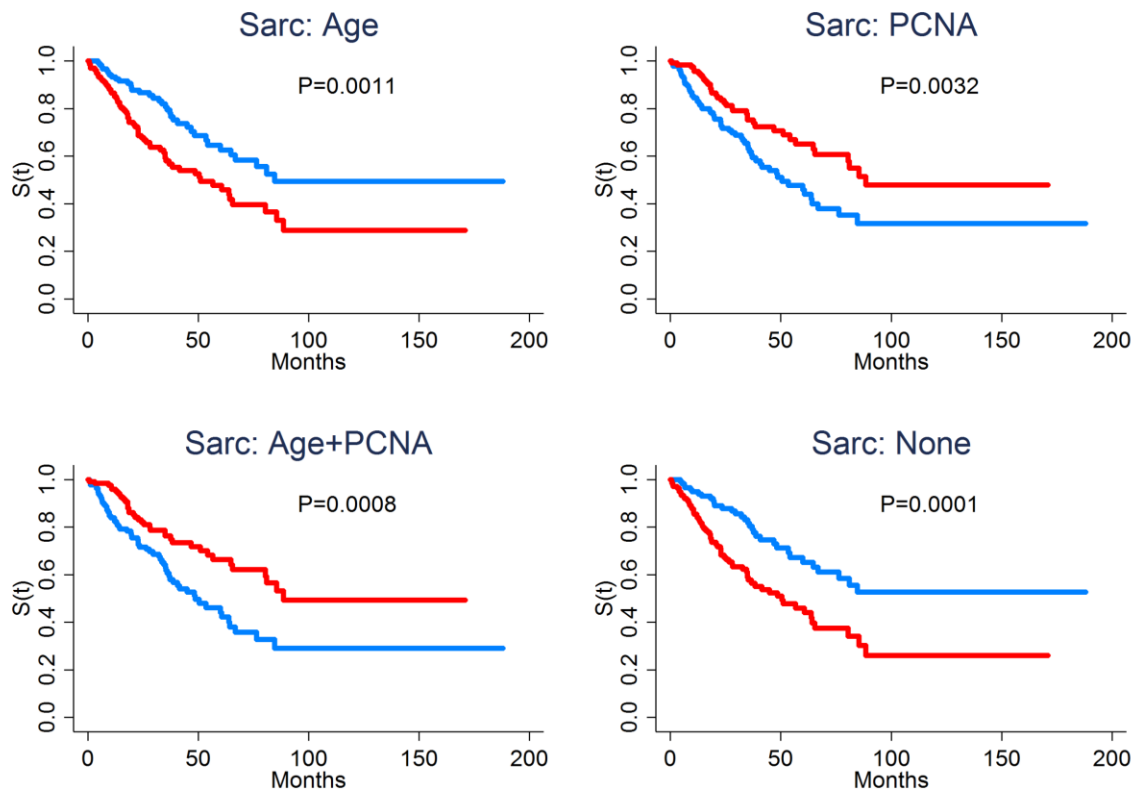

**Figure S31. Sarcoma: Kaplan-Meier logrank test results for single best binarized principal component (0,1) extracted from correlation matrix for  $p$  genes whose adjusted expression (via age, stage, *PCNA* metagene) resulted in significant gene-specific KM logrank tests.**

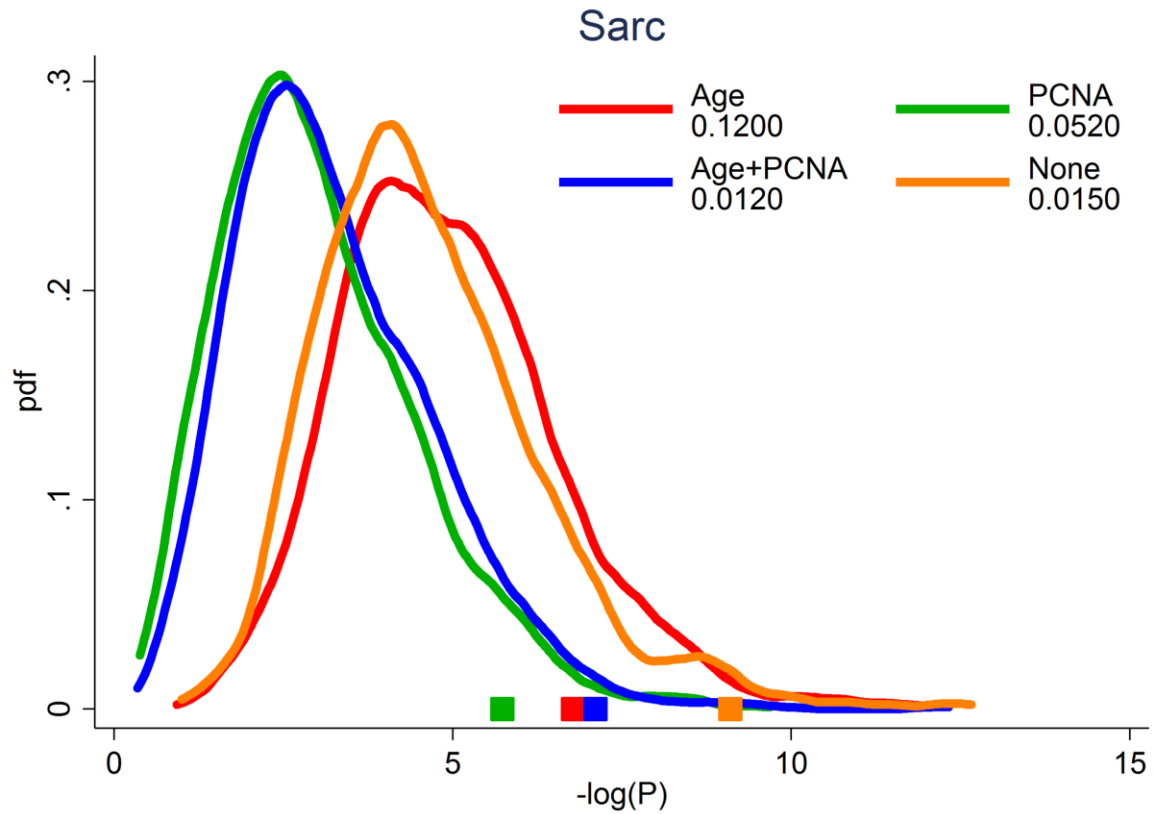

**Figure S32. Sarcoma: Empirical p-value test results for single best binarized principal component (0,1) extracted from correlation matrix for  $p$  genes whose adjusted expression (via age, *PCNA* metagene) resulted in significant gene-specific KM logrank tests. Square symbols denote the observed  $-\log(P)$  for the best binarized PC based on maximum likelihood analysis using KM analysis. Kernel density curves reflect the distribution of  $-\log(P)$  for KM analysis of the best binarized PC using  $p$  randomly selected genes  $B = 1000$  times.**



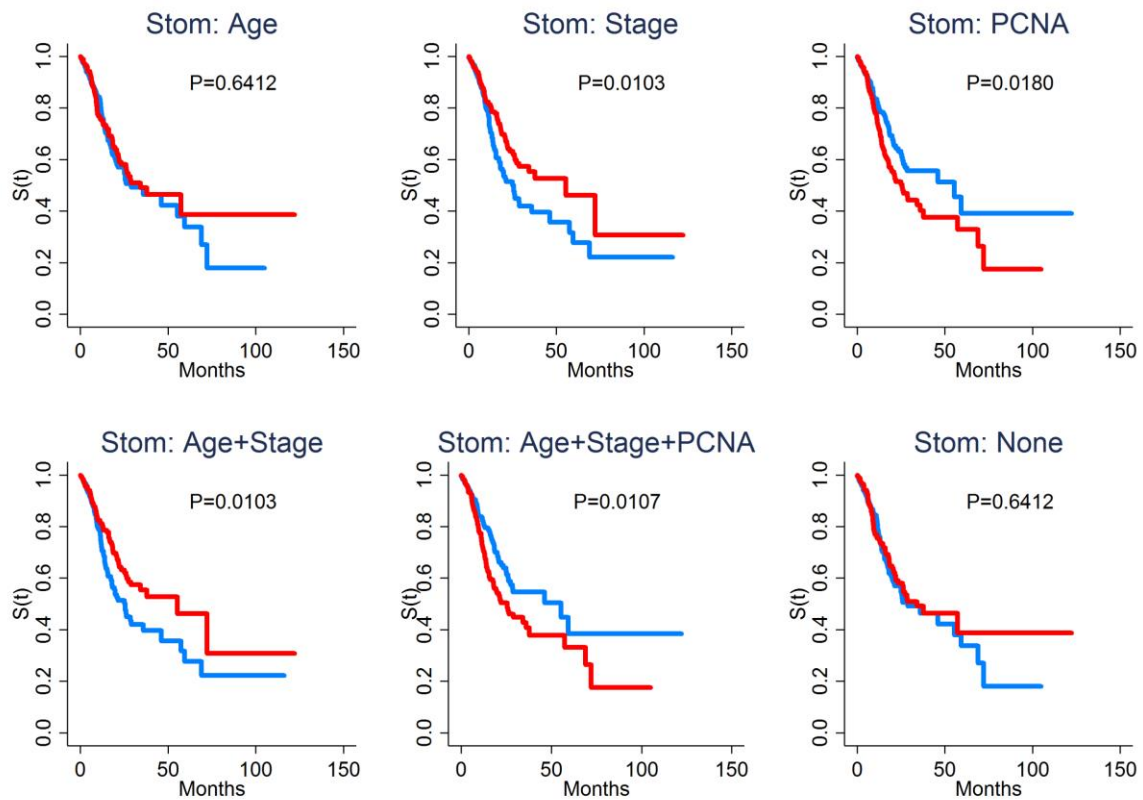

**Figure S33. Stomach: Kaplan-Meier logrank test results for single best binarized principal component (0,1) extracted from correlation matrix for  $p$  genes whose adjusted expression (via age, stage, *PCNA* metagene) resulted in significant gene-specific KM logrank tests.**

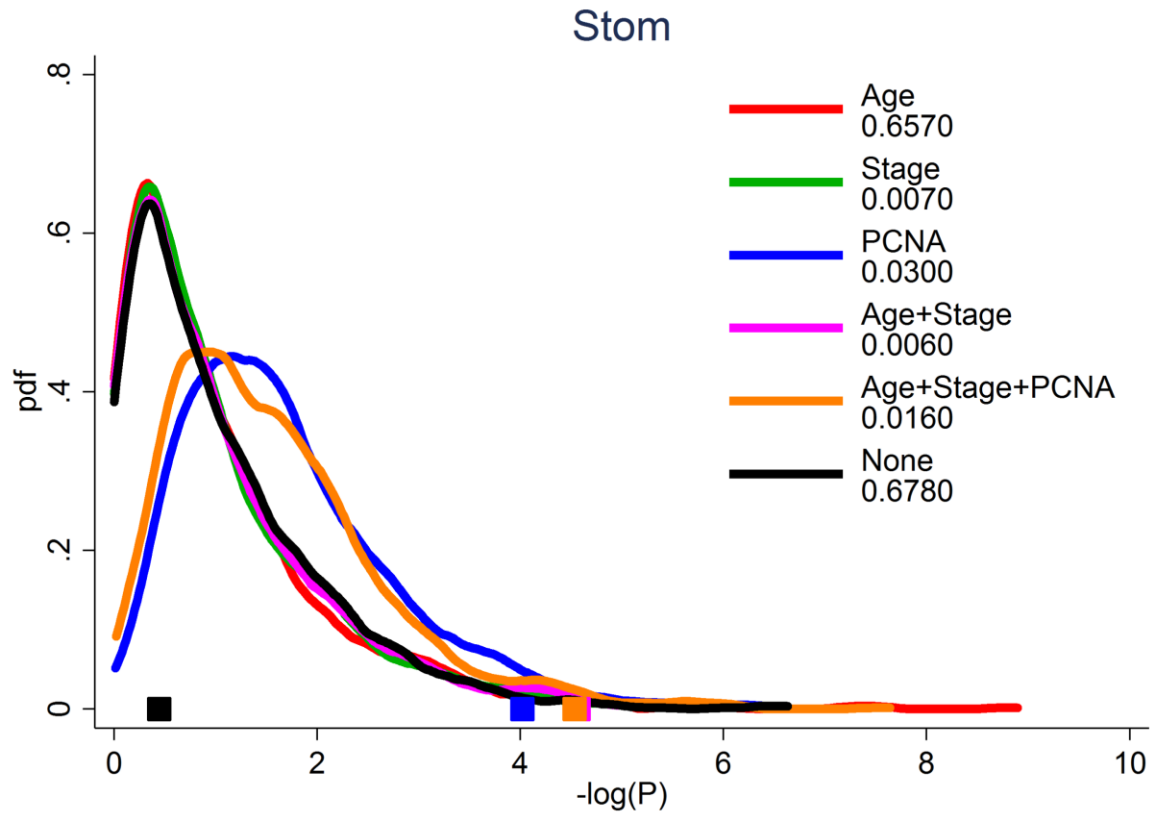

**Figure S34. Stomach: Empirical p-value test results for single best binarized principal component (0,1) extracted from correlation matrix for  $p$  genes whose adjusted expression (via age, stage, *PCNA* metagene) resulted in significant gene-specific KMlogrank tests. Square symbols denote the observed  $-\log(P)$  for the best binarized PC based on maximum likelihood analysis using KM analysis. Kernel density curves reflect the distribution of  $-\log(P)$  for KM analysis of the best binarized PC using  $p$  randomly selected genes  $B = 1000$  times.**

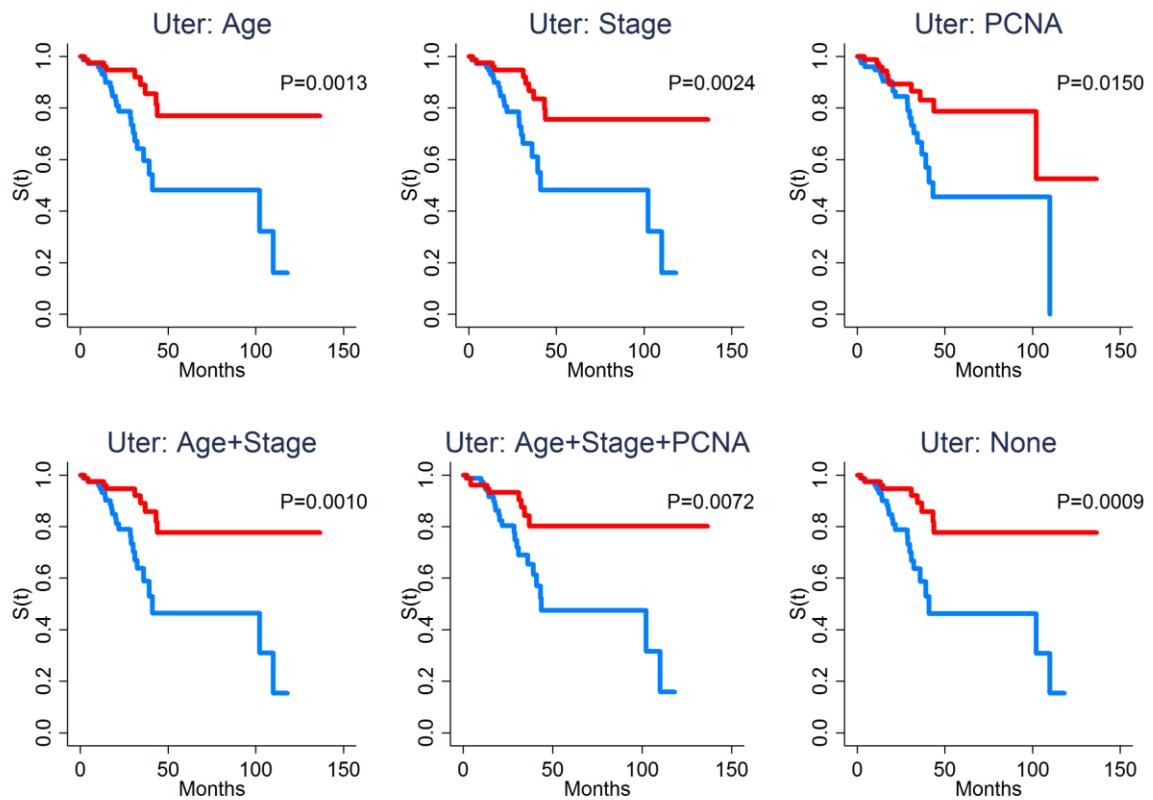

**Figure S35. Uterine: Kaplan-Meier logrank test results for single best binarized principal component (0,1) extracted from correlation matrix for  $p$  genes whose adjusted expression (via age, stage, *PCNA* metagene) resulted in significant gene-specific KM logrank tests.**

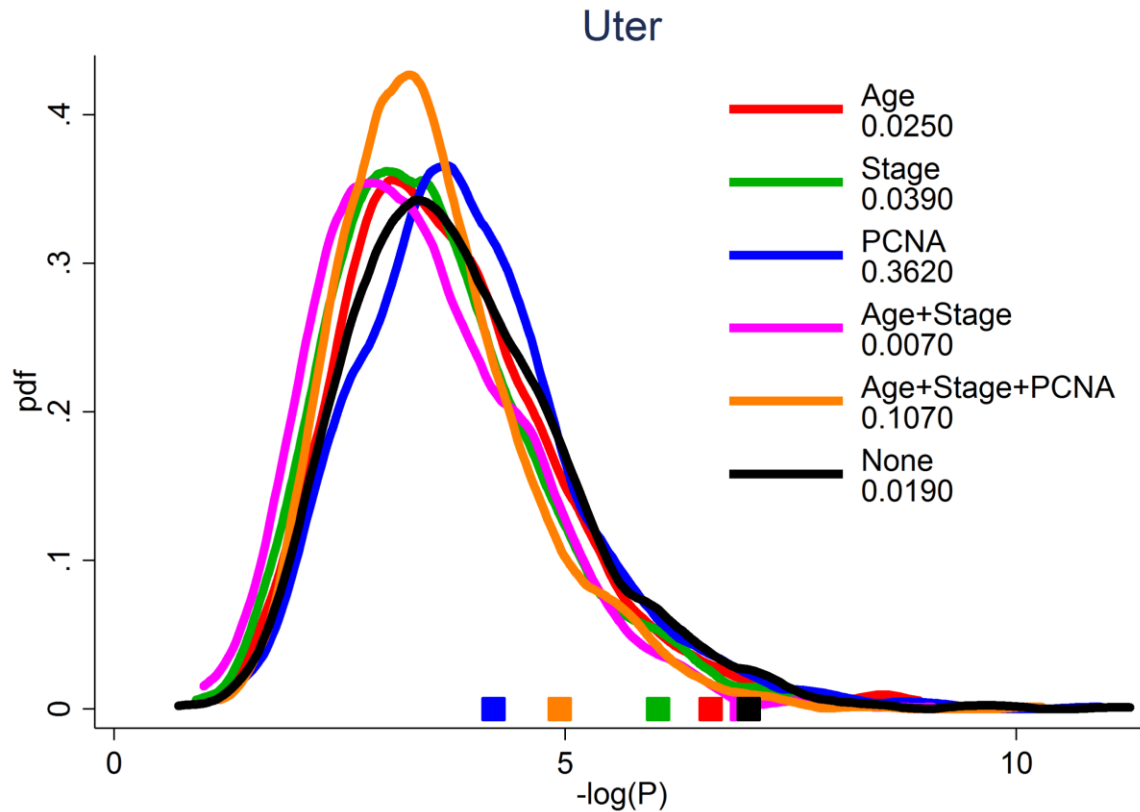

**Figure S36. Uterine: Empirical p-value test results for single best binarized principal component (0,1) extracted from correlation matrix for  $p$  genes whose adjusted expression (via age, stage, *PCNA* metagene) resulted in significant gene-specific KMlogrank tests. Square symbols denote the observed  $-\log(P)$  for the best binarized PC based on maximum likelihood analysis using KM analysis. Kernel density curves reflect the distribution of  $-\log(P)$  for KM analysis of the best binarized PC using  $p$  randomly selected genes  $B = 1000$  times.**
